# Supplementary material for: Spontaneous formation and protonation of dicyanofuran isomers under physical conditions found in interstellar space: quantum chemical insights into thermodynamics and spectroscopy
Source: Royal Society of Chemistry journal article supplement (doi:10.1039/d3nj05632e), 2024-01-01
Supplement: d3nj05632e1.pdf [file d3nj05632e1.pdf]

**Spontaneous formation and protonation of dicyanofuran isomers under  
interstellar space physical conditions: quantum chemical insights into  
thermodynamics and spectroscopy**

René Simbizi,<sup>a,b</sup> Sahar Abdalla,<sup>c,d</sup> Thierry Bukuru,<sup>a,b</sup> Pierre Claver Mpawenayo,<sup>b,e</sup> Manassé Nihombere<sup>b,e</sup> and  
Godefroid Gahungu<sup>b,e,†</sup>

**Electronic Supplementary Information**

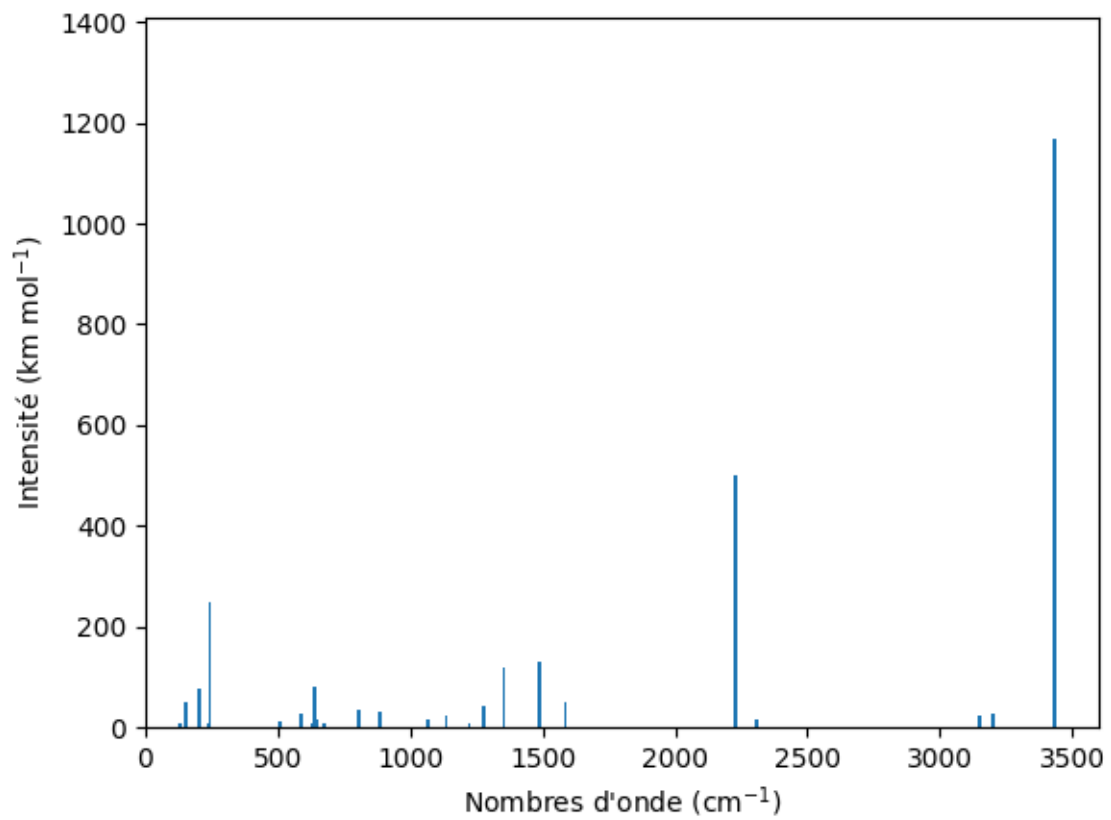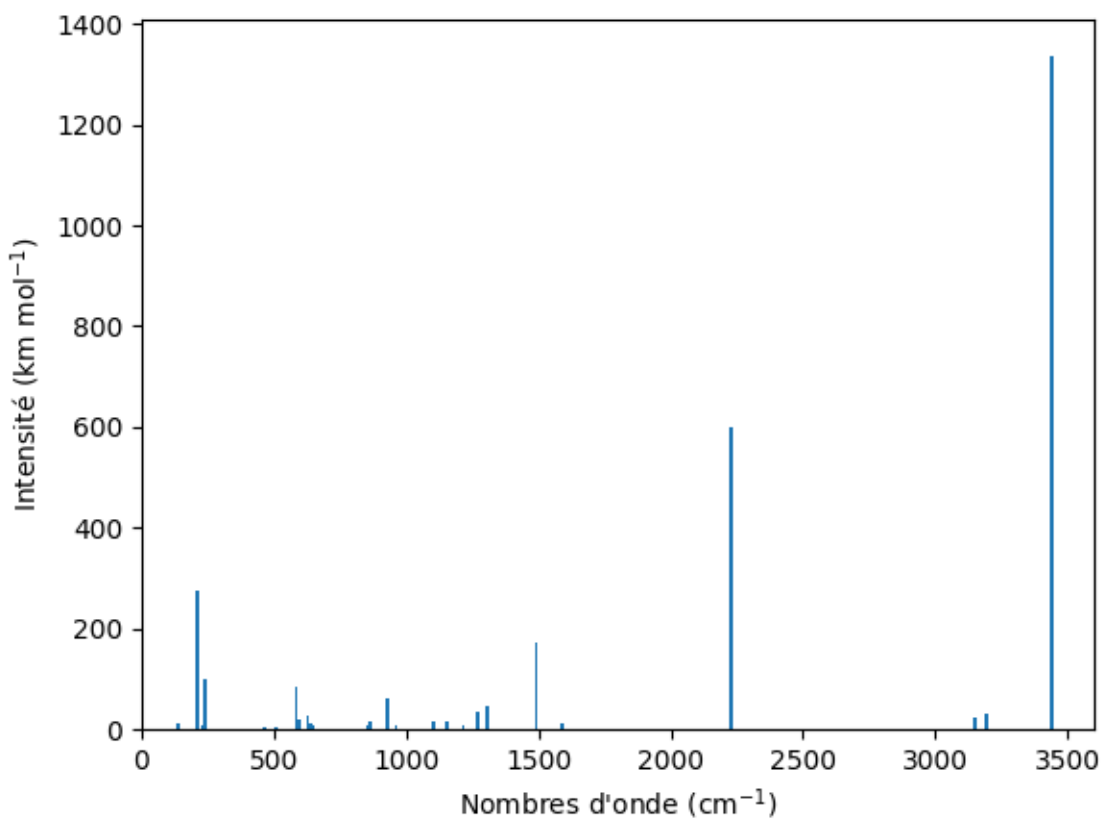

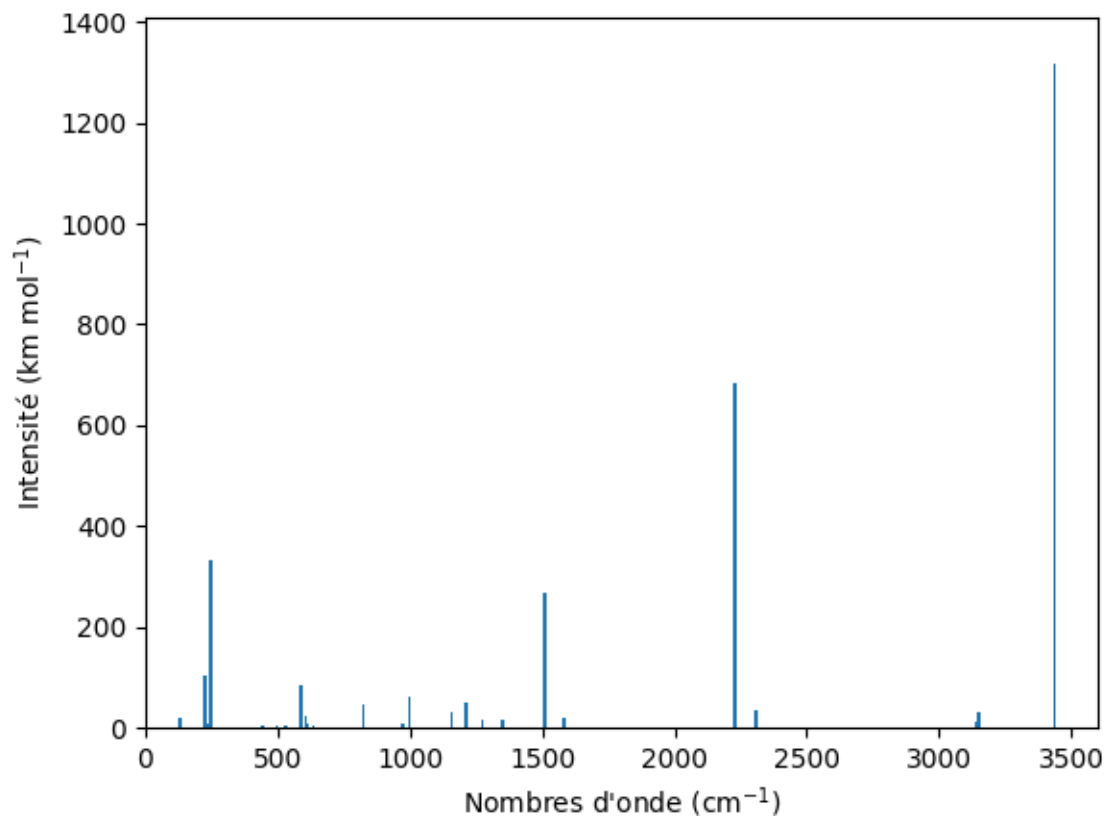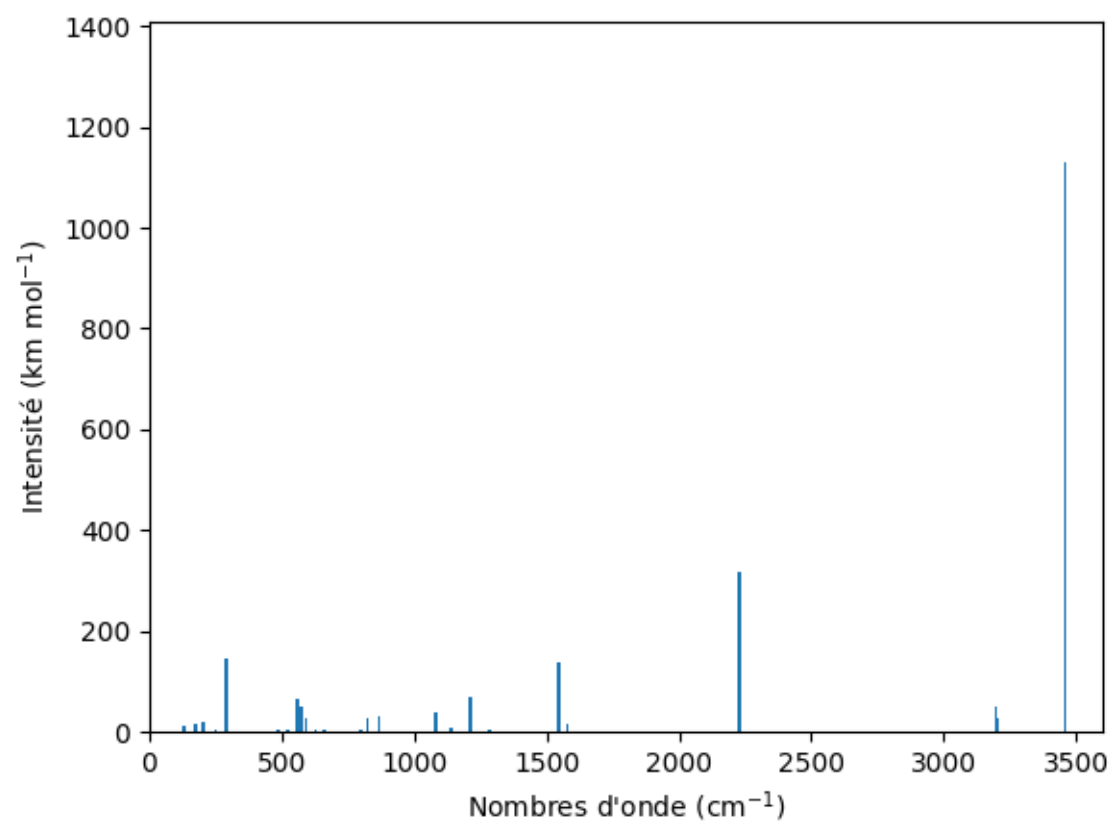

**Figure S1.** The IR spectra The Raman spectra of 23DCFH<sup>+</sup>, 24DCFH<sup>+</sup>, 25DCFH<sup>+</sup> and 34DCFH<sup>+</sup> (from up to down).

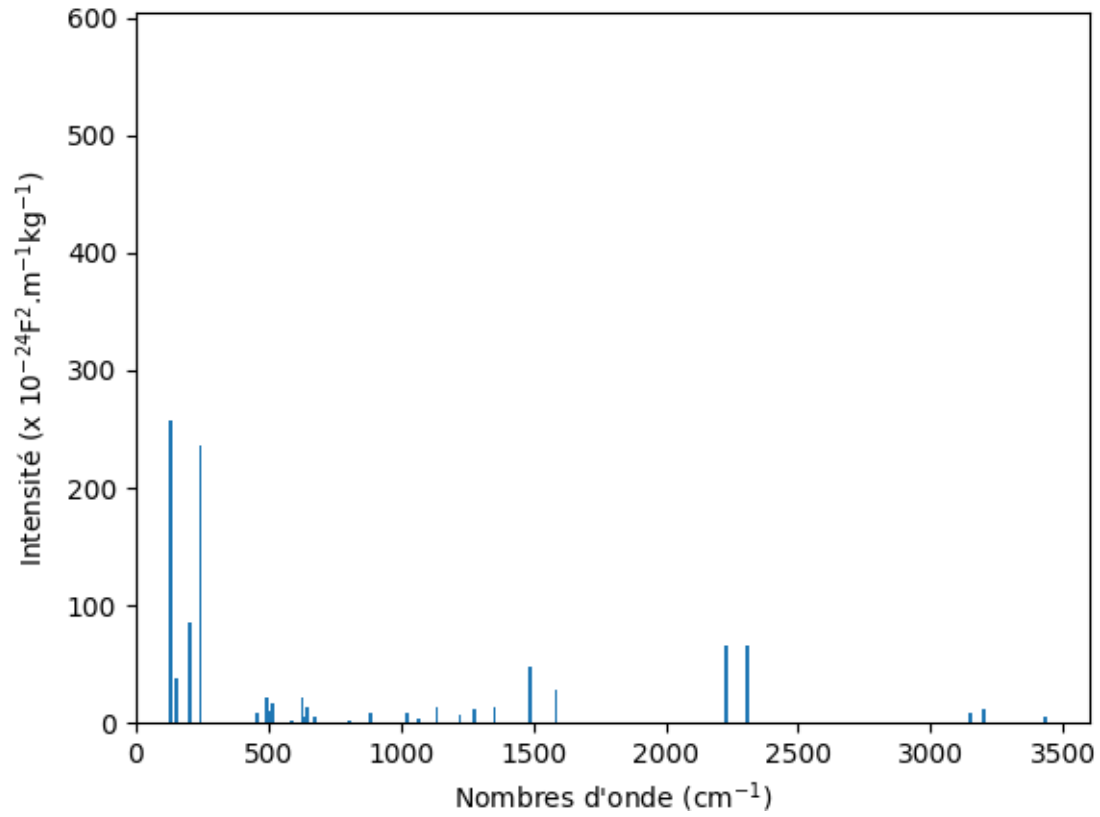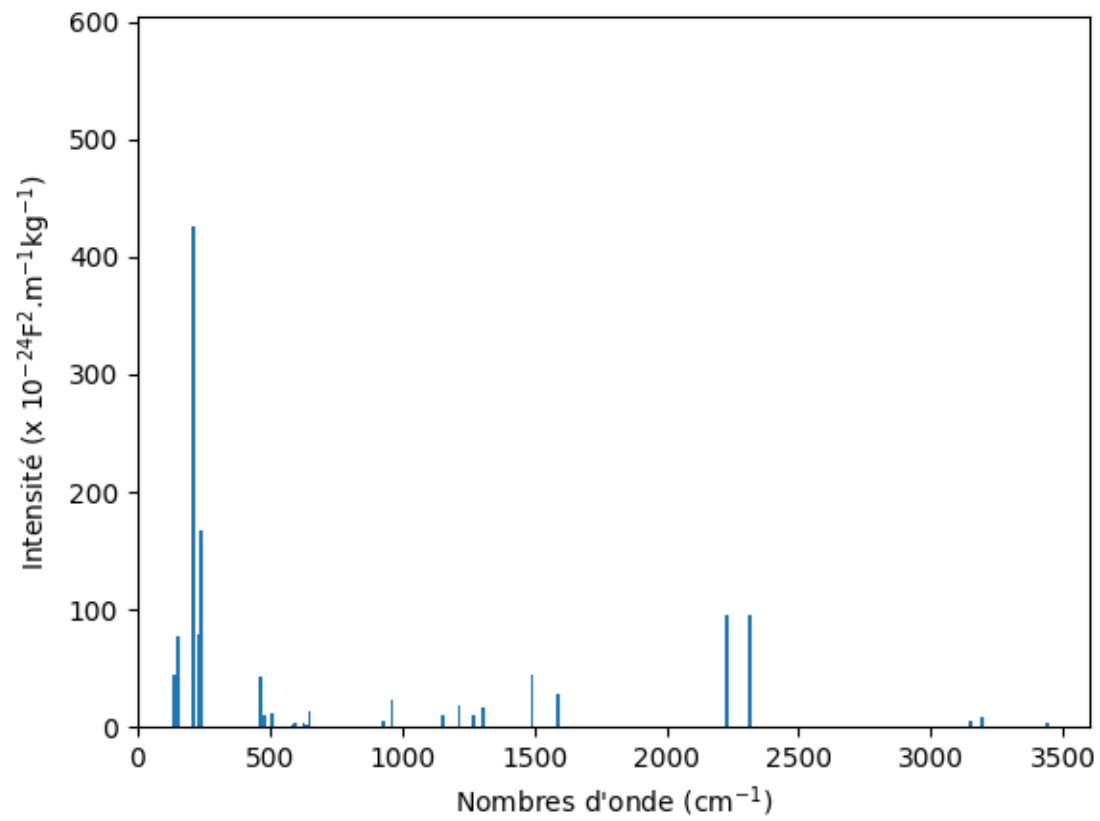

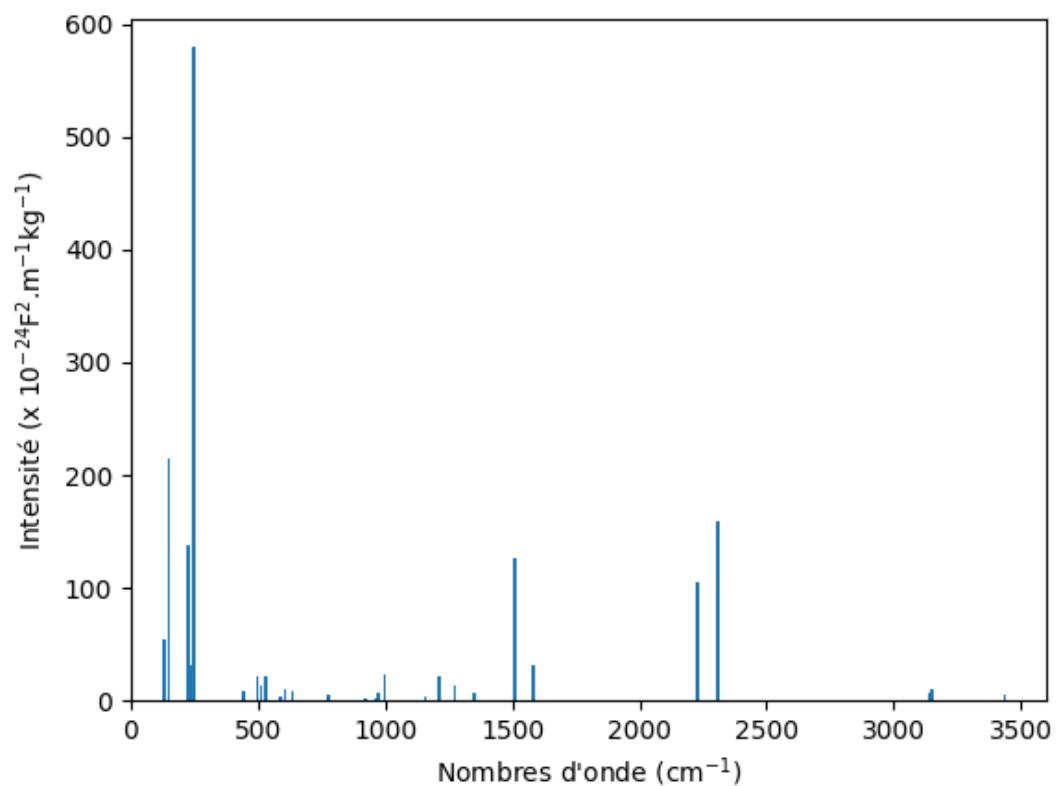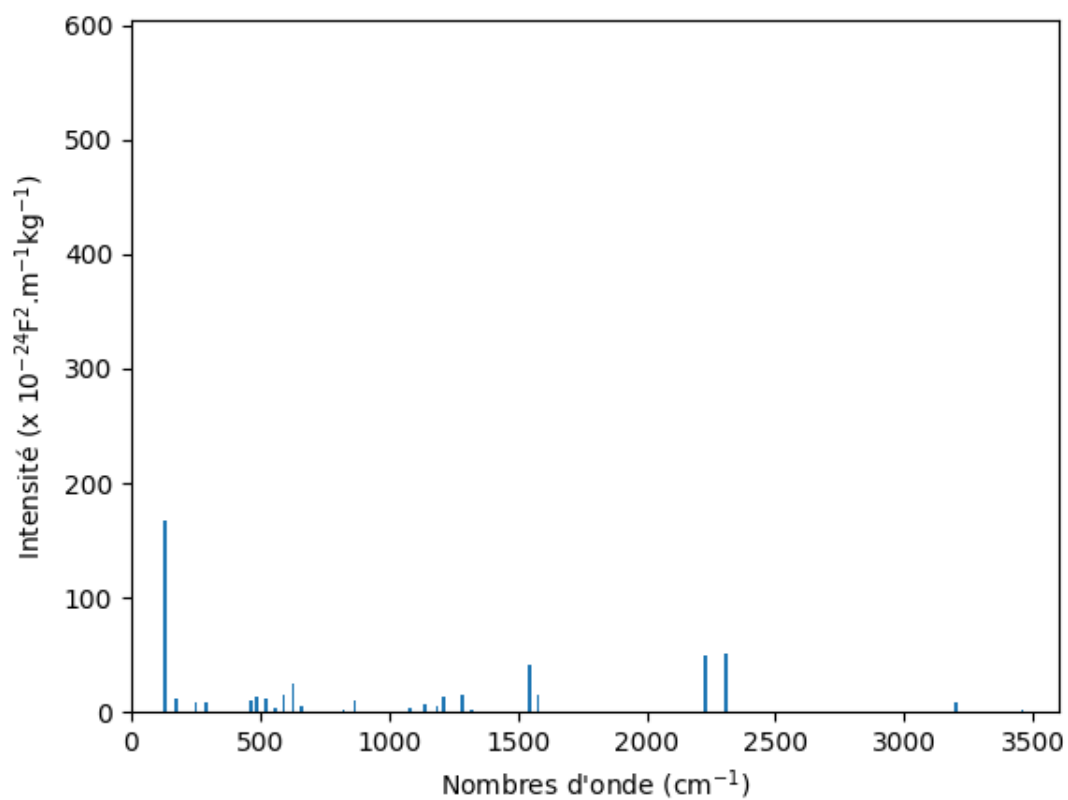

**Figure S2.** The Raman spectra of 23DCFH<sup>+</sup>, 24DCFH<sup>+</sup>, 25DCFH<sup>+</sup> and 34DCFH<sup>+</sup> (from top to bottom).

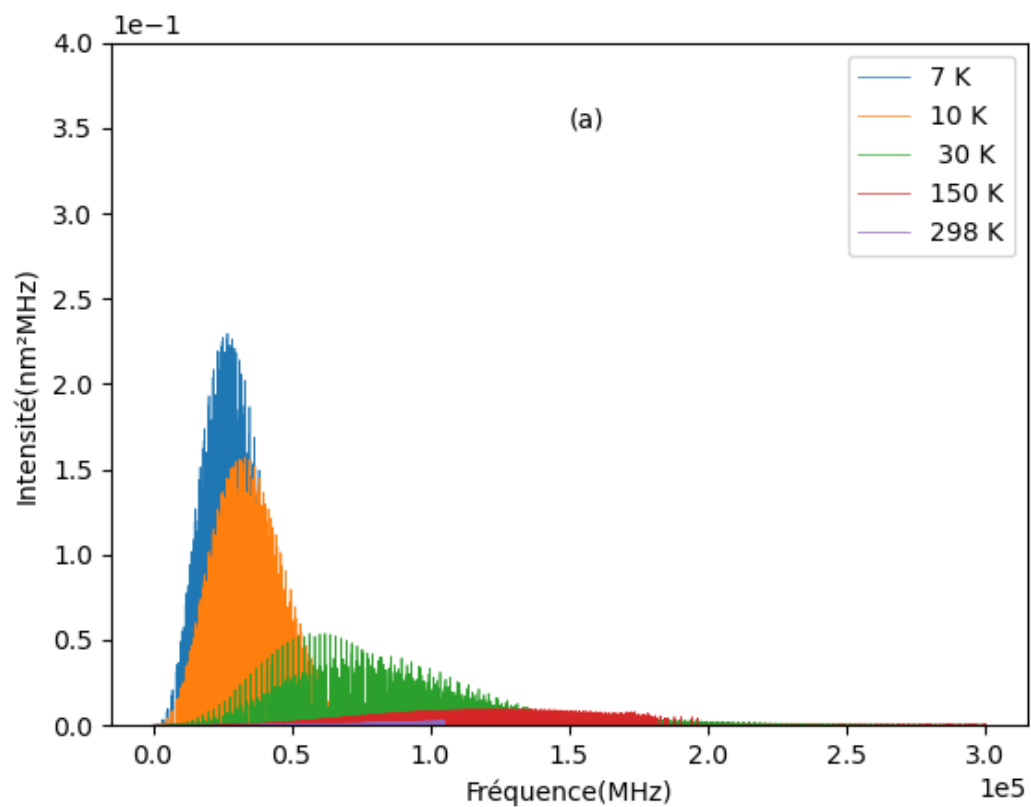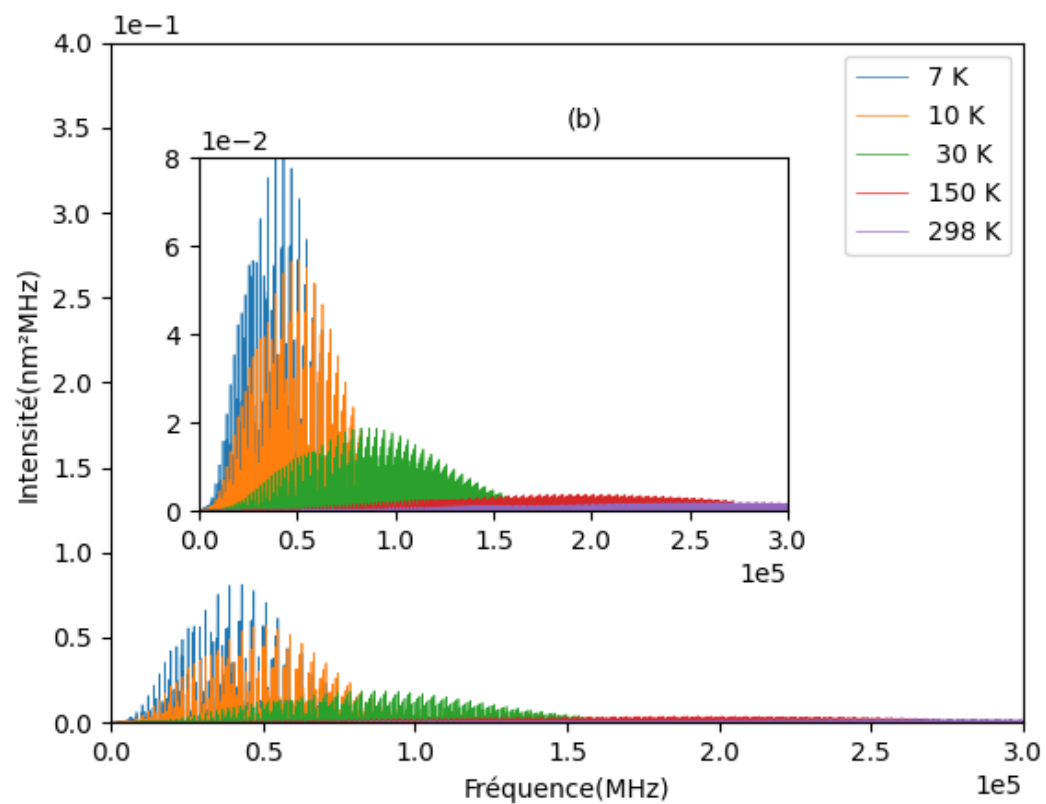

**Figure S3.** Plots of rotational line transition intensities (including  $^{14}\text{N}$  hyperfine quadrupole couplings) for 25DCFH $^+$  (up) and (b) 34DCFH $^+$  (down).

**Table S1.** B3LYP/6-31G(d,p) optimized structures for furan, 23DCF, 24DCF, 25DCF and 34DCF23CFH<sup>+</sup>, 24CFH<sup>+</sup>, 25CFH<sup>+</sup>, 34CFH<sup>+</sup> and HCNH<sup>+</sup>.

| Parameter         | Furan <sup>a</sup> | 23CF   | 24CF   | 25CF   | 34CF   | 23CFH <sup>+</sup> | 24CFH <sup>+</sup> | 25CFH <sup>+</sup> | 34CFH <sup>+</sup> | HCNH <sup>+</sup> <sup>b</sup> |
|-------------------|--------------------|--------|--------|--------|--------|--------------------|--------------------|--------------------|--------------------|--------------------------------|
| Bond length(in Å) |                    |        |        |        |        |                    |                    |                    |                    |                                |
| O1-C2             | 1.3583 (1.362)     | 1.3607 | 1.3755 | 1.3645 | 1.3551 | 1.3550             | 1.3698             | 1.3589             | 1.3494             |                                |
| O1-C5             | 1.3583 (1.362)     | 1.3595 | 1.3450 | 1.3645 | 1.3551 | 1.3538             | 1.3392             | 1.3589             | 1.3494             |                                |
| C2-C3             | 1.3621 (1.361)     | 1.3817 | 1.3602 | 1.3737 | 1.3817 | 1.3667             | 1.3679             | 1.3753             | 1.3684             |                                |
| C3-C4             | 1.4520 (1.431)     | 1.4342 | 1.4343 | 11.418 | 1.4524 | 1.4508             | 1.4510             | 1.4354             | 1.4690             |                                |
| C4-C5             | 1.3621 (1.361)     | 1.3602 | 1.3740 | 1.3737 | 1.3667 | 1.3619             | 1.3757             | 1.3753             | 1.3684             |                                |
| C5-H/C9           |                    | 1.0785 | 1.0787 | 1.4160 | 1.0782 | 1.0723             | 1.0727             | 1.4099             | 1.0722             | 1.08464 (1.0779)               |
| C2-H/C8           |                    | 1.4137 | 1.4154 | 1.4159 | 1.0782 | 1.4099             | 1.4099             | 1.4099             | 1.0722             |                                |
| C4-H/C9           |                    | 1.0791 | 1.4221 | 1.0796 | 1.4202 | 1.0767             | 1.4099             | 1.0772             | 1.4099             |                                |
| C3-C9/H6          |                    | 1.4204 | 1.0791 | 1.0796 | 1.4202 | 1.4099             | 1.0767             | 1.0772             | 1.4099             |                                |
| C≡N               |                    | 1.1637 | 1.1630 | 1.1636 | 1.1627 | 1.0723             | 1.0727             | 1.4099             | 1.0722             | 1.1397 (1.1368)                |
| N7-H              |                    |        |        |        |        | 1.0094             | 1.0091             | 1.0113             | 1.0096             | 1.0171 (1.0091)                |
| N9-H              |                    |        |        |        |        | 1.0114             | 1.0110             | 1.0113             | 1.0096             |                                |
| Bond angle(in°)   |                    |        |        |        |        |                    |                    |                    |                    |                                |
| O1-C2=C3          | 110.81 (110.7)     | 109.74 | 110.28 | 110.68 | 110.37 | 108.27             | 110.68             | 112.09             | 108.71             |                                |
| C2=C3-C4          | 105.62 (106.0)     | 106.11 | 105.79 | 106.16 | 105.68 | 107.41             | 104.17             | 104.91             | 107.14             |                                |
| C5=C4-C3          | 105.62 (106.0)     | 105.89 | 106.17 | 106.16 | 105.68 | 104.24             | 107.52             | 105.88             | 103.94             |                                |
| O1-C5=C4          | 110.81 (110.7)     | 111.00 | 110.59 | 110.68 | 110.37 | 111.47             | 109.00             | 111.44             | 110.84             |                                |
| C5-O1-C2          | 107.12 (106.5)     | 107.24 | 107.14 | 106.28 | 107.89 | 108.60             | 108.61             | 105.66             | 109.35             |                                |
| O1-C2-H6/C8       | 114.91 (115.9)     | 118.15 | 117.60 | 117.61 | 116.91 | 119.87             | 117.68             | 117.11             | 117.39             |                                |
| O1-C5-H9/C9       | 114.91 (115.9)     | 115.67 | 116.76 | 117.61 | 116.91 | 115.84             | 117.36             | 117.08             | 116.90             |                                |
| O1-C2-C8/H6       |                    | 118.15 | 117.60 | 117.61 | 116.91 | 176.91             | 176.21             | 175.80             | 177.37             |                                |
| O1-C5-H7/C9       |                    | 115.67 | 116.76 | 117.61 | 116.91 | 124.44             | 128.32             | 127.50             | 126.58             |                                |
| C2/C4-C8-N        |                    | 179.30 | 178.79 | 178.49 | 179.78 | 179.69             | 179.56             | 178.68             | 178.16             |                                |
| C2-C3-C9/H        |                    | 126.64 | 126.90 | 126.03 | 126.63 | 132.67             | 132.06             | 126.73             | 132.25             |                                |
| C4/C5/C3-C9-N     |                    | 178.88 | 179.67 | 178.48 | 179.77 | 108.27             | 110.68             | 112.09             | 108.71             |                                |

<sup>a</sup>The numbering scheme used is shown on figure 1. <sup>a</sup> Experimental data for furan from ... ; <sup>b</sup> Experimental data for HCNH<sup>+</sup> from Amano and Keiichi Amano and Tanaka<sup>32</sup>

**Table S2.** Gas phase G2(MP2), G3B3 and G4 enthalpy and Gibbs free energy ( $\Delta_r H$  and  $\Delta_r G$  in kJ/mol) of the reaction producing cyanofuran and their protonated forms at 150K and 5K, at  $P=10^{-5}$  atm.

| Equation                                    | T=150 K      |              |              | T=5 K        |              |              | Methods |
|---------------------------------------------|--------------|--------------|--------------|--------------|--------------|--------------|---------|
|                                             | $\Delta_r H$ | $\Delta_r G$ | $\Delta_r S$ | $\Delta_r H$ | $\Delta_r G$ | $\Delta_r S$ |         |
| $C_4H_4O^+ + CN^- \rightarrow 2CNF + H$     | - 566.333    | - 557.829    | - 0.057      | - 533.423    | - 533.239    | - 0.037      | G2MP2   |
|                                             | 1 - 571.855  | - 563.343    | - 0.057      | - 565.853    | - 594.560    | - 0.293      | G3B3    |
|                                             | - 563.212    | - 554.597    | - 0.057      | - 563.015    | - 562.818    | - 0.039      | G4      |
| $C_4H_4O^+ + CN^- \rightarrow 3CNF + H$     | - 573.212    | - 564.727    | - 0.057      | - 540.286    | - 540.102    | - 0.037      | G2MP2   |
|                                             | 2 - 578.277  | - 569.765    | - 0.057      | - 572.257    | - 600.964    | - 0.039      | G3B3    |
|                                             | - 570.369    | - 561.786    | - 0.057      | - 570.167    | - 569.972    | - 0.039      | G4      |
| $C_4H_3OCN^+ + CN^- \rightarrow 23CNF + H$  | - 617.864    | - 608.922    | - 0.060      | - 584.872    | - 584.670    | - 0.040      | G2MP2   |
|                                             | 3 - 619.663  | - 610.920    | - 0.058      | - 613.726    | - 642.420    | - 0.042      | G3B3    |
|                                             | - 610.972    | - 602.151    | - 0.059      | - 610.854    | - 610.641    | - 0.043      | G4      |
| $C_4H_3OCN^+ + CN^- \rightarrow 24CNF + H$  | - 622.580    | - 613.655    | - 0.059      | - 589.637    | - 589.433    | - 0.041      | G2MP2   |
|                                             | 4 - 623.688  | - 614.947    | - 0.058      | - 617.793    | - 646.485    | - 0.043      | G3B3    |
|                                             | - 615.013    | - 606.191    | - 0.059      | - 614.939    | - 614.721    | - 0.044      | G4      |
| $C_4H_3OCN^+ + CN^- \rightarrow 25CNF + H$  | - 614.430    | - 605.480    | - 0.060      | - 581.462    | - 581.257    | - 0.042      | G2MP2   |
|                                             | 5 - 616.520  | - 607.766    | - 0.058      | - 610.605    | - 639.299    | - 0.042      | G3B3    |
|                                             | - 607.483    | - 598.638    | - 0.059      | - 607.381    | - 607.168    | - 0.043      | G4      |
| $C_4H_3OCN^+ + CN^- \rightarrow 34CNF + H$  | - 625.289    | - 616.389    | - 0.059      | - 592.289    | - 592.090    | - 0.039      | G2MP2   |
|                                             | 6 - 625.980  | - 617.239    | - 0.058      | - 620.020    | - 648.719    | - 0.041      | G3B3    |
|                                             | - 621.658    | - 612.878    | - 0.059      | - 621.56     | - 621.35     | - 0.042      | G4      |
| $23CNF + H_3^+ \rightarrow 23DCNFH^+ + H_2$ | - 351.008    | - 317.533    | - 0.223      | - 346.976    | - 346.332    | - 0.129      | G2MP2   |
|                                             | 7 - 346.577  | - 345.177    | - 0.009      | - 346.361    | - 346.366    | 0.001        | G3B3    |
|                                             | - 344.975    | - 343.376    | - 0.011      | - 344.652    | - 344.655    | 0.001        | G4      |
| $24CNF + H_3^+ \rightarrow 24DCNFH^+ + H_2$ | - 347.645    | - 314.144    | - 0.223      | - 343.602    | - 342.959    | - 0.129      | G2MP2   |
|                                             | 8 - 343.077  | - 341.704    | - 0.009      | - 342.882    | - 342.888    | - 0.001      | G3B3    |
|                                             | - 341.620    | - 340.021    | - 0.011      | - 341.302    | - 341.307    | - 0.001      | G4      |
| $25CNF + H_3^+ \rightarrow 25DCNFH^+ + H_2$ | - 371.58     | - 307.18     | - 0.43       | - 363.36     | - 362.18     | - 0.235      | G2MP2   |
|                                             | 9 - 336.68   | - 334.88     | - 0.00       | - 333.04     | - 333.05     | 0.001        | G3B3    |
|                                             | - 333.95     | - 333.49     | - 0.01       | - 334.20     | - 334.20     | 0.001        | G4      |
| $34CNF + H_3^+ \rightarrow 34DCNFH^+ + H_2$ | - 385.30     | - 320.93     | - 0.43       | - 377.13     | - 375.95     | - 0.236      | G2MP2   |
|                                             | 10 - 349.30  | - 334.88     | - 0.01       | - 351.29     | - 351.29     | 0.001        | G3B3    |
|                                             | - 347.871    | - 346.29     | - 0.01       | - 347.55     | - 347.54     | - 0.001      | G4      |



**Table S3.** B3LYP/6-31G(d,p) frequencies ( $\text{cm}^{-1}$ ), Infrared intensities ( $\text{km}\cdot\text{mol}^{-1}$ ), Raman activities ( $\text{\AA}^4/\text{amu}$ ) and intensities ( $\times 10^{-24} \text{F}^2\cdot\text{m}^{-1}\cdot\text{kg}^{-1}$ ) for  $23\text{CNFH}^+$ .

| <b>Non Scaled frequencies</b> | <b>Scaled frequencies</b> | <b>IR Intensity</b> | <b>Raman Activity</b> | <b>Raman Intensity</b> |
|-------------------------------|---------------------------|---------------------|-----------------------|------------------------|
| 3685.38                       | 3434.99                   | 1169.58             | 61.75                 | 4.54                   |
| 3374.54                       | 3199.56                   | 27.80               | 135.91                | 12.52                  |
| 3321.89                       | 3149.68                   | 22.66               | 84.11                 | 8.12                   |
| 2309.18                       | 2305.75                   | 17.58               | 298.63                | 65.40                  |
| 2233.97                       | 2226.57                   | 499.03              | 278.22                | 65.96                  |
| 1610.11                       | 1585.93                   | 51.58               | 59.83                 | 28.06                  |
| 1517.67                       | 1485.62                   | 130.95              | 89.39                 | 47.11                  |
| 1384.65                       | 1352.68                   | 119.09              | 21.60                 | 13.37                  |
| 1291.82                       | 1278.39                   | 41.66               | 17.45                 | 11.87                  |
| 1272.15                       | 1222.61                   | 9.39                | 8.98                  | 6.57                   |
| 1161.22                       | 1135.13                   | 22.85               | 16.72                 | 13.76                  |
| 1101.74                       | 1065.72                   | 17.13               | 3.71                  | 3.37                   |
| 1065.48                       | 1021.14                   | 1.83                | 9.30                  | 9.01                   |
| 904.45                        | 887.85                    | 0.77                | 0.18                  | 0.22                   |
| 900.61                        | 883.88                    | 29.73               | 7.35                  | 8.84                   |
| 806.81                        | 804.81                    | 36.80               | 0.94                  | 1.30                   |
| 677.46                        | 674.83                    | 9.31                | 2.65                  | 4.72                   |
| 657.69                        | 646.12                    | 15.69               | 6.98                  | 13.23                  |
| 644.19                        | 639.79                    | 79.71               | 2.40                  | 4.62                   |
| 633.42                        | 627.51                    | 6.78                | 10.95                 | 21.66                  |
| 590.61                        | 585.79                    | 28.11               | 0.98                  | 2.14                   |
| 531.23                        | 514.70                    | 0.87                | 6.05                  | 15.95                  |
| 521.59                        | 507.43                    | 13.66               | 3.65                  | 9.82                   |
| 495.53                        | 492.17                    | 1.13                | 7.86                  | 22.11                  |
| 465.78                        | 458.37                    | 2.49                | 2.86                  | 8.93                   |
| 239.63                        | 242.56                    | 247.17              | 28.25                 | 236.79                 |
| 230.82                        | 237.57                    | 9.23                | 0.13                  | 1.10                   |
| 206.92                        | 204.17                    | 78.62               | 7.73                  | 86.19                  |
| 156.49                        | 153.19                    | 48.60               | 2.08                  | 37.86                  |
| 133.06                        | 129.68                    | 8.66                | 10.51                 | 256.60                 |

**Table S4.** B3LYP/6-31G(d,p) frequencies ( $\text{cm}^{-1}$ ), Infrared intensities ( $\text{km}\cdot\text{mol}^{-1}$ ), Raman activities ( $\text{\AA}^4/\text{amu}$ ) and intensities ( $\times 10^{-24} \text{F}^2\cdot\text{m}^{-1}\cdot\text{kg}^{-1}$ ) for 24DCFH<sup>+</sup>.

| <b>Non Scaled frequencies</b> | <b>Scaled frequencies</b> | <b>IR Intensity</b> | <b>Raman Activity</b> | <b>Raman Intensity</b> |
|-------------------------------|---------------------------|---------------------|-----------------------|------------------------|
| 3690.62                       | 3439.97                   | 1335.01             | 45.32                 | 3.31                   |
| 3368.79                       | 3194.24                   | 30.86               | 86.18                 | 7.98                   |
| 3323.50                       | 3151.17                   | 22.67               | 46.53                 | 4.49                   |
| 2318.45                       | 2313.63                   | 2.52                | 436.40                | 94.83                  |
| 2238.00                       | 2229.88                   | 601.07              | 400.07                | 94.54                  |
| 1625.86                       | 1591.10                   | 11.93               | 61.65                 | 28.74                  |
| 1526.11                       | 1492.39                   | 173.33              | 85.95                 | 44.93                  |
| 1337.89                       | 1304.39                   | 48.34               | 24.18                 | 15.90                  |
| 1303.64                       | 1269.53                   | 34.15               | 15.61                 | 10.73                  |
| 1255.29                       | 1214.69                   | 8.38                | 24.36                 | 18.00                  |
| 1198.04                       | 1152.53                   | 16.34               | 12.70                 | 10.20                  |
| 1148.55                       | 1101.22                   | 16.36               | 1.14                  | 0.98                   |
| 980.00                        | 962.30                    | 8.43                | 21.36                 | 22.65                  |
| 950.35                        | 927.40                    | 61.22               | 4.60                  | 5.15                   |
| 874.49                        | 864.15                    | 15.89               | 0.48                  | 0.60                   |
| 860.45                        | 852.60                    | 6.90                | 0.73                  | 0.93                   |
| 659.27                        | 650.13                    | 7.59                | 7.52                  | 14.13                  |
| 646.35                        | 638.39                    | 14.01               | 1.35                  | 2.60                   |
| 624.32                        | 628.76                    | 28.15               | 1.87                  | 3.68                   |
| 615.14                        | 597.30                    | 21.54               | 1.51                  | 3.20                   |
| 605.57                        | 583.40                    | 83.34               | 0.96                  | 2.12                   |
| 543.51                        | 534.19                    | 0.51                | 0.27                  | 0.66                   |
| 530.69                        | 508.86                    | 4.98                | 4.22                  | 11.30                  |
| 484.79                        | 479.16                    | 0.91                | 3.40                  | 9.94                   |
| 474.52                        | 466.34                    | 4.57                | 14.00                 | 42.63                  |
| 238.89                        | 240.74                    | 98.21               | 19.79                 | 167.92                 |
| 237.39                        | 233.63                    | 8.88                | 8.82                  | 78.62                  |
| 215.19                        | 209.65                    | 276.59              | 40.00                 | 426.42                 |
| 157.60                        | 152.12                    | 2.02                | 4.23                  | 77.96                  |
| 133.71                        | 138.84                    | 11.44               | 2.08                  | 45.11                  |

**Table S5.** B3LYP/6-31G(d,p) frequencies ( $\text{cm}^{-1}$ ), Infrared intensities ( $\text{km.mol}^{-1}$ ), Raman activities ( $\text{\AA}^4/\text{amu}$ ) and intensities ( $\times 10^{-24} \text{ F}^2.\text{m}^{-1}.\text{kg}^{-1}$ ) for for25DCFH<sup>+</sup>.

| <b>Non Scaled frequencies</b> | <b>Scaled frequencies</b> | <b>IR Intensity</b> | <b>Raman Activity</b> | <b>Raman Intensity</b> |
|-------------------------------|---------------------------|---------------------|-----------------------|------------------------|
| 3686.37                       | 3436.19                   | 1317.78             | 68.57                 | 5.03                   |
| 3322.11                       | 3150.29                   | 31.25               | 101.42                | 9.79                   |
| 3313.67                       | 3141.32                   | 12.03               | 64.35                 | 6.27                   |
| 2310.35                       | 2306.09                   | 36.40               | 723.93                | 158.49                 |
| 2237.35                       | 2228.75                   | 684.93              | 445.90                | 105.49                 |
| 1601.76                       | 1582.07                   | 21.47               | 66.34                 | 31.24                  |
| 1518.44                       | 1511.71                   | 268.99              | 248.61                | 127.04                 |
| 1379.73                       | 1347.73                   | 16.35               | 11.54                 | 7.19                   |
| 1284.61                       | 1274.80                   | 15.95               | 20.11                 | 13.73                  |
| 1232.37                       | 1211.42                   | 50.12               | 28.67                 | 21.28                  |
| 1209.41                       | 1158.70                   | 32.63               | 5.38                  | 4.29                   |
| 1034.81                       | 998.31                    | 61.64               | 23.71                 | 23.78                  |
| 990.66                        | 971.02                    | 9.00                | 7.14                  | 7.47                   |
| 987.43                        | 965.21                    | 0.50                | 2.03                  | 2.14                   |
| 918.21                        | 920.24                    | 0.05                | 1.06                  | 1.20                   |
| 817.69                        | 824.13                    | 47.33               | 0.72                  | 0.96                   |
| 691.40                        | 777.31                    | 2.31                | 3.53                  | 5.12                   |
| 646.72                        | 635.90                    | 5.12                | 4.48                  | 8.69                   |
| 638.65                        | 610.50                    | 9.15                | 0.45                  | 0.93                   |
| 611.72                        | 605.55                    | 23.73               | 5.14                  | 10.69                  |
| 608.39                        | 587.09                    | 82.91               | 1.57                  | 3.41                   |
| 545.95                        | 528.13                    | 4.06                | 8.82                  | 22.38                  |
| 522.91                        | 511.40                    | 0.69                | 5.04                  | 13.40                  |
| 504.27                        | 495.92                    | 3.03                | 7.95                  | 22.11                  |
| 465.40                        | 440.99                    | 5.32                | 2.78                  | 9.20                   |
| 240.53                        | 248.17                    | 332.42              | 71.72                 | 579.09                 |
| 238.52                        | 231.72                    | 7.48                | 3.42                  | 30.88                  |
| 230.09                        | 224.91                    | 105.08              | 14.46                 | 137.17                 |
| 153.47                        | 148.89                    | 1.66                | 11.19                 | 214.21                 |
| 131.54                        | 132.74                    | 20.78               | 2.34                  | 54.84                  |

**Table S6.** B3LYP/6-31G(d,p) frequencies ( $\text{cm}^{-1}$ ), Infrared intensities ( $\text{km.mol}^{-1}$ ), Raman activities ( $\text{\AA}^4/\text{amu}$ ) and intensities ( $\times 10^{-24} \text{ F}^2.\text{m}^{-1}.\text{kg}^{-1}$ ) for 34DCFH<sup>+</sup>.

| <b>Non Scaled frequencies</b> | <b>Scaled frequencies</b> | <b>IR Intensity</b> | <b>Raman Activity</b> | <b>Raman Intensity</b> |
|-------------------------------|---------------------------|---------------------|-----------------------|------------------------|
| 3710.26                       | 3458.46                   | 1129.24             | 18.78                 | 1.35                   |
| 3376.02                       | 3201.13                   | 26.41               | 97.43                 | 8.96                   |
| 3371.55                       | 3196.63                   | 49.27               | 70.61                 | 6.52                   |
| 2312.13                       | 2308.05                   | 0.19                | 235.43                | 51.44                  |
| 2237.67                       | 2229.42                   | 316.70              | 212.56                | 50.25                  |
| 1596.89                       | 1578.02                   | 17.65               | 30.52                 | 14.44                  |
| 1565.79                       | 1545.96                   | 138.07              | 84.64                 | 41.56                  |
| 1338.79                       | 1319.71                   | 2.00                | 2.17                  | 1.40                   |
| 1309.61                       | 1286.12                   | 4.59                | 22.72                 | 15.30                  |
| 1237.29                       | 1211.03                   | 70.22               | 17.90                 | 13.29                  |
| 1208.56                       | 1186.73                   | 1.28                | 5.92                  | 4.54                   |
| 1155.43                       | 1137.68                   | 9.02                | 8.97                  | 7.35                   |
| 1101.88                       | 1082.57                   | 40.05               | 4.91                  | 4.35                   |
| 881.69                        | 866.70                    | 32.55               | 7.67                  | 9.50                   |
| 827.27                        | 823.03                    | 26.52               | 1.90                  | 2.54                   |
| 808.20                        | 798.05                    | 5.42                | 0.42                  | 0.59                   |
| 662.61                        | 662.58                    | 2.73                | 3.31                  | 6.05                   |
| 648.02                        | 641.12                    | 1.46                | 0.19                  | 0.36                   |
| 633.22                        | 627.96                    | 6.08                | 12.46                 | 24.61                  |
| 596.73                        | 592.27                    | 25.86               | 7.11                  | 15.28                  |
| 583.52                        | 571.82                    | 51.84               | 0.22                  | 0.50                   |
| 583.28                        | 557.79                    | 67.21               | 1.23                  | 2.89                   |
| 522.15                        | 523.38                    | 5.13                | 4.59                  | 11.80                  |
| 491.69                        | 487.49                    | 6.20                | 4.84                  | 13.80                  |
| 481.50                        | 464.87                    | 0.15                | 3.23                  | 9.88                   |
| 269.33                        | 291.36                    | 144.29              | 1.26                  | 7.88                   |
| 249.21                        | 249.20                    | 5.26                | 1.16                  | 9.27                   |
| 214.33                        | 205.10                    | 18.39               | 0.04                  | 0.40                   |
| 168.73                        | 173.34                    | 15.51               | 0.76                  | 11.24                  |
| 134.15                        | 132.66                    | 11.71               | 7.10                  | 166.49                 |

**Table S7.** Different types of vibration modes and the corresponding numerical values of frequencies for 23DCFH<sup>+</sup>.

| Frequencies<br>(cm <sup>-1</sup> ) | PED<br>(%) | Mode  | Atoms |    |    |   | PED<br>(%) | Mode  | Atoms |   |    |   |
|------------------------------------|------------|-------|-------|----|----|---|------------|-------|-------|---|----|---|
|                                    |            |       | h     | k  | l  | m |            |       | h     | k | l  | m |
| <b>In plane vibration modes</b>    |            |       |       |    |    |   |            |       |       |   |    |   |
| 3458.46                            | 96%        | vNH   | 11    | 12 | 0  | 0 |            |       |       |   |    |   |
| 3201.13                            | 51%        | vCH   | 2     | 6  | 0  | 0 | 48%        | vCH   | 5     | 7 | 0  | 0 |
| 3196.63                            | 51%        | vCH   | 5     | 7  | 0  | 0 | 48%        | vCH   | 2     | 6 | 0  | 0 |
| 2308.05                            | 91%        | vC≡N  | 8     | 10 | 0  | 0 | 7%         | vCC   | 3     | 8 | 0  | 0 |
| 2229.42                            | 88%        | vC≡N  | 9     | 11 | 0  | 0 | 7%         | vCC   | 4     | 9 | 0  | 0 |
| 1578.02                            | 36%        | vC=C  | 4     | 5  | 0  | 0 | 16%        | vC=C  | 2     | 3 | 0  | 0 |
|                                    | 9%         | δCCC  | 4     | 3  | 8  | 0 | 6%         | δCCC  | 3     | 4 | 5  | 0 |
|                                    | 6%         | δCCC  | 3     | 4  | 9  | 0 |            |       |       |   |    |   |
| 1545.96                            | 43%        | vC=C  | 2     | 3  | 0  | 0 | 14%        | vC=C  | 4     | 5 | 0  | 0 |
|                                    | 8%         | δOCH  | 1     | 2  | 6  | 0 | 5%         | δCCH  | 3     | 2 | 6  | 0 |
| 1319.71                            | 45%        | vCC   | 3     | 4  | 0  | 0 | 8%         | vCC   | 4     | 9 | 0  | 0 |
|                                    | 7%         | vCC   | 3     | 8  | 0  | 0 | 6%         | vC=C  | 4     | 5 | 0  | 0 |
|                                    | 5%         | δC=CC | 5     | 4  | 9  | 0 |            |       |       |   |    |   |
| 1286.12                            | 16%        | δOCH  | 1     | 5  | 7  | 0 | 14%        | vCC   | 1     | 2 | 0  | 0 |
|                                    | 13%        | δOCH  | 1     | 2  | 6  | 0 | 12%        | vCC   | 3     | 4 | 0  | 0 |
|                                    | 12%        | vOC   | 1     | 5  | 0  | 0 | 9%         | δCCH  | 4     | 5 | 7  | 0 |
| 1211.03                            | 36%        | vOC   | 1     | 5  | 0  | 0 | 33%        | vOC   | 1     | 2 | 0  | 0 |
|                                    | 8%         | δOCH  | 1     | 5  | 7  | 0 |            |       |       |   |    |   |
| 1186.73                            | 20%        | δOCH  | 1     | 2  | 6  | 0 | 19%        | δOCH  | 1     | 5 | 7  | 0 |
|                                    | 18%        | δC=CH | 4     | 5  | 7  | 0 | 17%        | δC=CH | 3     | 2 | 6  | 0 |
|                                    | 9%         | vOC   | 1     | 5  | 0  | 0 | 8%         | vOC   | 1     | 2 | 0  | 0 |
| 1137.68                            | 13%        | vCC   | 3     | 8  | 0  | 0 | 12%        | δC=CC | 2     | 3 | 8  | 0 |
|                                    | 11%        | δC=CC | 5     | 4  | 9  | 0 | 8%         | vCC   | 4     | 9 | 0  | 0 |
|                                    | 7%         | δCC=C | 3     | 4  | 5  | 0 | 7%         | δOC=C | 1     | 5 | 4  | 0 |
| 1082.57                            | 30%        | vOC   | 1     | 2  | 0  | 0 | 15%        | vOC   | 1     | 5 | 0  | 0 |
|                                    | 11%        | δOCH  | 1     | 2  | 6  | 0 | 11%        | δOCH  | 1     | 5 | 7  | 0 |
|                                    | 8%         | δC=CC | 2     | 3  | 8  | 0 | 6%         | δC=CH | 4     | 5 | 7  | 0 |
| 866.70                             | 28%        | δCOC  | 5     | 1  | 2  | 0 | 18%        | vCC   | 3     | 4 | 0  | 0 |
|                                    | 9%         | vCC   | 3     | 8  | 0  | 0 | 8%         | δOCC  | 1     | 2 | 3  | 0 |
|                                    | 8%         | vOC=C | 1     | 5  | 4  | 0 | 8%         | δC=CH | 3     | 2 | 6  | 0 |
| 662.58                             | 37%        | δCC≡N | 4     | 9  | 11 | 3 | 27%        | δCC≡N | 4     | 9 | 11 | 4 |
|                                    | 15%        | vCC   | 3     | 8  | 0  | 0 | 8%         | vCC   | 4     | 9 | 0  | 0 |
|                                    | 6%         | δCCC  | 3     | 4  | 9  | 0 |            |       |       |   |    |   |
| 641.12                             | 17%        | δCC≡N | 4     | 9  | 11 | 4 | 7%         | δCC≡N | 4     | 9 | 11 | 3 |
| 627.96                             | 58%        | vCC   | 3     | 8  | 0  | 0 | 10%        | δCCC  | 3     | 4 | 8  | 0 |
|                                    | 9%         | vCC   | 3     | 4  | 0  | 0 |            |       |       |   |    |   |

|                                     |     |                       |   |    |    |    |     |                       |   |    |    |    |
|-------------------------------------|-----|-----------------------|---|----|----|----|-----|-----------------------|---|----|----|----|
| 592.27                              | 44% | $\delta_{CC\equiv N}$ | 4 | 9  | 11 | 4  | 19% | $\delta_{CC\equiv N}$ | 4 | 9  | 11 | 3  |
|                                     | 9%  | $\delta_{CC\equiv N}$ | 3 | 8  | 2  | 10 | 9%  | $\delta_{CC\equiv N}$ | 3 | 8  | 1  | 10 |
| 571.82                              | 40% | $\delta_{CC\equiv N}$ | 4 | 9  | 11 | 4  | 27% | $\delta_{CC\equiv N}$ | 4 | 9  | 11 | 3  |
|                                     | 23% | $\delta_{CNH}$        | 9 | 11 | 12 | 2  |     |                       |   |    |    |    |
| 557.79                              | 56% | $\delta_{CNH}$        | 9 | 11 | 12 | 2  | 13% | $\delta_{CC\equiv N}$ | 4 | 9  | 11 | 3  |
|                                     | 10% | $\delta_{CC\equiv N}$ | 3 | 8  | 2  | 10 | 8%  | $\delta_{CNH}$        | 9 | 11 | 12 | 1  |
|                                     | 8%  | $\delta_{CC\equiv N}$ | 3 | 8  | 1  | 10 |     |                       |   |    |    |    |
| 523.38                              | 36% | $\delta_{CC\equiv N}$ | 4 | 9  | 11 | 3  | 30% | $\delta_{CC\equiv N}$ | 4 | 9  | 11 | 4  |
|                                     | 19% | $\nu_{CC}$            | 3 | 8  | 0  | 0  |     |                       |   |    |    |    |
| 487.49                              | 29% | $\delta_{C=CC}$       | 2 | 3  | 8  | 0  | 27% | $\nu_{CC}$            | 4 | 9  | 0  | 0  |
|                                     | 8%  | $\delta_{C=CC}$       | 2 | 3  | 8  | 0  | 7%  | $\delta_{C=CC}$       | 5 | 4  | 9  | 0  |
|                                     | 6%  | $\delta_{CC\equiv N}$ | 3 | 8  | 2  | 10 | 5%  | $\delta_{CC=C}$       | 3 | 4  | 5  | 0  |
| 464.87                              | 37% | $\delta_{CC\equiv N}$ | 3 | 8  | 1  | 10 | 36% | $\delta_{CC\equiv N}$ | 3 | 8  | 2  | 10 |
|                                     | 18% | $\delta_{CC\equiv N}$ | 4 | 9  | 11 | 4  |     |                       |   |    |    |    |
| 291.36                              | 55% | $\delta_{CNH}$        | 9 | 11 | 12 | 1  | 21% | $\delta_{CC\equiv N}$ | 4 | 9  | 11 | 4  |
|                                     | 14% | $\delta_{CNH}$        | 9 | 11 | 12 | 2  |     |                       |   |    |    |    |
| 249.20                              | 44% | $\delta_{CC\equiv N}$ | 4 | 9  | 11 | 3  | 37% | $\delta_{CC\equiv N}$ | 4 | 9  | 11 | 4  |
| 205.10                              | 32% | $\delta_{CC\equiv N}$ | 3 | 8  | 1  | 10 | 19% | $\delta_{CNH}$        | 9 | 11 | 12 | 1  |
|                                     | 9%  | $\delta_{CC\equiv N}$ | 3 | 8  | 2  | 10 |     |                       |   |    |    |    |
| 173.34                              | 38% | $\delta_{CC\equiv N}$ | 3 | 8  | 2  | 10 | 31% | $\delta_{CC\equiv N}$ | 3 | 8  | 1  | 10 |
|                                     | 15% | $\delta_{CC\equiv N}$ | 4 | 9  | 11 | 4  |     |                       |   |    |    |    |
| 132.66                              | 36% | $\delta_{CC\equiv N}$ | 4 | 9  | 11 | 3  | 21% | $\delta_{CC\equiv N}$ | 4 | 9  | 11 | 4  |
|                                     | 14% | $\nu_{CC}$            | 3 | 8  | 0  | 0  | 11% | $\nu_{CC}$            | 4 | 9  | 0  | 0  |
| <b>Out of plane vibration modes</b> |     |                       |   |    |    |    |     |                       |   |    |    |    |
| 823.03                              | 28% | $\gamma_{CC=CH}$      | 9 | 4  | 5  | 7  | 26% | $\gamma_{CC=CH}$      | 3 | 4  | 5  | 7  |
|                                     | 20% | $\gamma_{COCH}$       | 2 | 1  | 5  | 7  |     |                       |   |    |    |    |
| 798.05                              | 26% | $\gamma_{CC=CH}$      | 8 | 3  | 2  | 6  | 25% | $\gamma_{CC=CH}$      | 4 | 3  | 2  | 6  |
|                                     | 21% | $\gamma_{COCH}$       | 5 | 1  | 2  | 6  |     |                       |   |    |    |    |
| 641.12                              | 18% | $\gamma_{CCCC}$       | 9 | 4  | 3  | 8  | 16% | $\gamma_{C=CCC}$      | 2 | 3  | 4  | 9  |
|                                     | 13% | $\gamma_{CCC=C}$      | 8 | 3  | 4  | 5  |     |                       |   |    |    |    |
| 205.10                              | 13% | $\gamma_{C=CCC}$      | 2 | 3  | 4  | 9  | 7%  | $\gamma_{CCC=C}$      | 8 | 3  | 4  | 5  |
| 173.34                              | 5%  | $\gamma_{CCCC}$       | 9 | 4  | 3  | 8  |     |                       |   |    |    |    |

**Table S8.** Different types of vibration modes and the corresponding numerical values of frequencies for 24DCFH<sup>+</sup>.

| Frequencies<br>(cm <sup>-1</sup> ) | PED<br>(%) | Mode  | Atoms |    |    |    | PED<br>(%) | Mode  | Atoms |    |    |    |
|------------------------------------|------------|-------|-------|----|----|----|------------|-------|-------|----|----|----|
|                                    |            |       | h     | k  | l  | m  |            |       | h     | k  | l  | m  |
| <b>In plane vibration modes</b>    |            |       |       |    |    |    |            |       |       |    |    |    |
| 3439.97                            | 97%        | vNH   | 10    | 12 | 0  | 0  |            |       |       |    |    |    |
| 3194.24                            | 99%        | vCH   | 5     | 7  | 0  | 0  |            |       |       |    |    |    |
| 3151.17                            | 99%        | vCH   | 3     | 6  | 0  | 0  |            |       |       |    |    |    |
| 2313.63                            | 85%        | vC≡N  | 9     | 11 | 0  | 0  | 15%        | vCC   | 4     | 9  | 0  | 0  |
| 2229.88                            | 84%        | vC≡N  | 8     | 10 | 0  | 0  | 13%        | vCC   | 2     | 8  | 0  | 0  |
| 1591.10                            | 27%        | vC=C  | 4     | 5  | 0  | 0  | 24%        | vC=C  | 2     | 3  | 0  | 0  |
|                                    | 11%        | vCC   | 4     | 9  | 0  | 0  | 6%         | δCCH  | 4     | 3  | 6  | 0  |
| 1492.39                            | 38%        | vC=C  | 2     | 3  | 0  | 0  | 16%        | vC=C  | 4     | 5  | 0  | 0  |
|                                    | 10%        | vCC   | 2     | 8  | 0  | 0  | 9%         | vCC   | 4     | 9  | 0  | 0  |
|                                    | 5%         | vCC   | 3     | 7  | 0  | 0  |            |       |       |    |    |    |
| 1304.39                            | 21%        | vCC   | 3     | 4  | 0  | 0  | 13         | vOC   | 1     | 5  | 0  | 0  |
|                                    | 13%        | vCC   | 4     | 5  | 0  | 0  | 7%         | δCCH  | 4     | 5  | 7  | 0  |
|                                    | 6%         | vOC   | 1     | 2  | 0  | 0  | 6%         | δCCH  | 2     | 3  | 6  | 0  |
| 1269.53                            | 19%        | vCC   | 3     | 4  | 0  | 0  | 18%        | vCC   | 1     | 2  | 0  | 0  |
|                                    | 16%        | vCCH  | 4     | 9  | 0  | 0  | 11%        | δOCH  | 1     | 5  | 7  | 0  |
|                                    | 10%        | vCC   | 2     | 8  | 0  | 0  |            |       |       |    |    |    |
| 1214.69                            | 30%        | vOC   | 1     | 5  | 0  | 0  | 19%        | vOC   | 1     | 2  | 0  | 0  |
|                                    | 8%         | vCC   | 2     | 8  | 0  | 0  | 7%         | δCCH  | 2     | 3  | 6  | 0  |
|                                    | 7%         | δCCH  | 4     | 5  | 7  | 0  | 7%         | δOCH  | 1     | 5  | 7  | 0  |
| 1152.53                            | 32%        | δOCH  | 1     | 5  | 7  | 0  | 25%        | vOC   | 1     | 5  | 0  | 0  |
|                                    | 20%        | δCCH  | 4     | 5  | 7  | 0  | 8%         | vCC   | 4     | 5  | 0  | 0  |
| 1101.22                            | 33%        | δCCH  | 4     | 3  | 6  | 0  | 32%        | δCCH  | 2     | 3  | 6  | 0  |
|                                    | 11%        | vCC   | 2     | 8  | 0  | 0  | 10%        | vCC   | 4     | 9  | 0  | 0  |
| 962.30                             | 20%        | vCC   | 3     | 4  | 0  | 0  | 14%        | vOC   | 1     | 2  | 0  | 0  |
|                                    | 13%        | δC=CC | 2     | 3  | 4  | 0  | 9%         | δOC=C | 1     | 2  | 3  | 0  |
|                                    | 8%         | δCCC  | 3     | 4  | 5  | 0  | 7%         | vCC   | 4     | 9  | 0  | 0  |
| 927.40                             | 19%        | vOC   | 1     | 2  | 0  | 0  | 18%        | δCOC  | 5     | 1  | 2  | 0  |
|                                    | 16%        | vCC   | 3     | 4  | 0  | 0  | 12%        | δCCH  | 4     | 5  | 7  | 0  |
|                                    | 9%         | δOCC  | 1     | 5  | 4  | 0  | 8%         | vC=C  | 2     | 3  | 0  | 0  |
| 650.13                             | 26%        | vCC≡N | 2     | 8  | 0  | 0  | 23%        | vCC≡N | 4     | 9  | 0  | 0  |
|                                    | 9%         | δCOC  | 5     | 1  | 2  | 0  | 6%         | δOC=C | 1     | 2  | 3  | 0  |
|                                    | 6%         | δOCC  | 1     | 5  | 4  | 0  |            |       |       |    |    |    |
| 638.39                             | 22%        | δCC≡N | 2     | 8  | 2  | 10 | 19%        | δCNH  | 8     | 10 | 12 | 5  |
| 628.76                             | 31%        | δCC≡N | 4     | 9  | 11 | 3  | 10%        | δCC≡N | 4     | 9  | 11 | 4  |
|                                    | 10%        | δCNH  | 8     | 10 | 12 | 6  |            |       |       |    |    |    |
| 597.30                             | 38%        | δCC≡N | 2     | 8  | 1  | 10 | 20%        | δCC≡N | 2     | 8  | 2  | 10 |

|                                     |     |                                 |   |    |    |    |     |                                 |   |    |    |    |
|-------------------------------------|-----|---------------------------------|---|----|----|----|-----|---------------------------------|---|----|----|----|
|                                     | 10% | $\delta\text{CNH}$              | 8 | 10 | 12 | 6  | 7%  | $\delta\text{C=CC}$             | 3 | 2  | 8  | 0  |
|                                     | 6%  | $\delta\text{OCC}$              | 1 | 2  | 8  | 0  |     |                                 |   |    |    |    |
| 583.40                              | 69% | $\delta\text{CNH}$              | 8 | 10 | 12 | 6  | 9%  | $\delta\text{CC}\equiv\text{N}$ | 4 | 9  | 11 | 4  |
| 534.19                              | 26% | $\delta\text{CC}\equiv\text{N}$ | 4 | 9  | 11 | 4  | 26% | $\delta\text{CC}\equiv\text{N}$ | 2 | 8  | 1  | 10 |
|                                     | 18% | $\delta\text{CC}\equiv\text{N}$ | 2 | 8  | 2  | 10 | 7%  | $\delta\text{C=CC}$             | 5 | 4  | 9  | 0  |
| 508.86                              | 33% | $\delta\text{CC}\equiv\text{N}$ | 4 | 9  | 11 | 3  | 29% | $\delta\text{CC}\equiv\text{N}$ | 2 | 8  | 2  | 10 |
|                                     | 9%  | $\delta\text{CC}\equiv\text{N}$ | 4 | 9  | 11 | 4  |     |                                 |   |    |    |    |
| 479.16                              | 34% | $\delta\text{CC}\equiv\text{N}$ | 2 | 8  | 2  | 10 | 29% | $\delta\text{CC}\equiv\text{N}$ | 4 | 9  | 11 | 3  |
|                                     | 13% | $\delta\text{CC}\equiv\text{N}$ | 4 | 9  | 11 | 4  |     |                                 |   |    |    |    |
| 466.34                              | 23% | $\nu\text{CC}$                  | 2 | 8  | 0  | 0  | 20% | $\nu\text{CC}$                  | 4 | 9  | 0  | 0  |
|                                     | 7%  | $\delta\text{CC}\equiv\text{N}$ | 2 | 8  | 1  | 10 | 6%  | $\delta\text{CCC}$              | 3 | 4  | 5  | 0  |
|                                     | 6%  | $\delta\text{CC}$               | 3 | 4  | 0  | 0  | 6%  | $\delta\text{C=CC}$             | 2 | 3  | 4  | 0  |
| 240.74                              | 46% | $\delta\text{CNH}$              | 8 | 10 | 12 | 5  | 11% | $\delta\text{CC}\equiv\text{N}$ | 2 | 8  | 2  | 10 |
|                                     | 9%  | $\nu\text{C}\equiv\text{N}$     | 8 | 10 | 0  | 0  | 6%  | $\delta\text{CC}\equiv\text{N}$ | 4 | 9  | 11 | 3  |
|                                     | 6%  | $\delta\text{CNN}$              | 2 | 8  | 1  | 10 |     |                                 |   |    |    |    |
| 233.63                              | 25% | $\delta\text{CC}\equiv\text{N}$ | 2 | 8  | 1  | 10 | 23% | $\delta\text{CC}\equiv\text{N}$ | 2 | 8  | 2  | 10 |
|                                     | 17% | $\delta\text{CC}\equiv\text{N}$ | 4 | 9  | 11 | 4  | 8%  | $\delta\text{CCC}$              | 3 | 4  | 9  | 0  |
|                                     | 8%  | $\delta\text{CCC}$              | 5 | 4  | 9  | 0  | 6%  | $\delta\text{C=CC}$             | 3 | 2  | 8  | 0  |
| 209.65                              | 59% | $\delta\text{CNH}$              | 8 | 10 | 12 | 5  | 12% | $\nu\text{C}\equiv\text{N}$     | 8 | 10 | 0  | 0  |
|                                     | 5%  | $\delta\text{CC}\equiv\text{N}$ | 2 | 8  | 2  | 10 |     |                                 |   |    |    |    |
| 152.12                              | 29% | $\delta\text{CC}\equiv\text{N}$ | 2 | 8  | 1  | 10 | 22% | $\delta\text{CC}\equiv\text{N}$ | 2 | 8  | 2  | 10 |
|                                     | 12% | $\delta\text{OCC}$              | 1 | 2  | 8  | 0  | 11% | $\delta\text{CCC}$              | 3 | 2  | 8  | 0  |
|                                     | 8%  | $\delta\text{CCC}$              | 3 | 4  | 9  | 0  | 8%  | $\delta\text{C=CC}$             | 5 | 4  | 9  | 0  |
| 138.84                              | 20% | $\delta\text{CNH}$              | 8 | 10 | 12 | 5  |     |                                 |   |    |    |    |
| <b>Out of plane vibration modes</b> |     |                                 |   |    |    |    |     |                                 |   |    |    |    |
| 864.15                              | 26% | $\gamma\text{CCCH}$             | 8 | 2  | 3  | 6  | 25% | $\gamma\text{HCCC}$             | 6 | 3  | 4  | 9  |
|                                     | 21% | $\gamma\text{OC=CH}$            | 1 | 2  | 3  | 6  | 17% | $\gamma\text{CCCH}$             | 5 | 4  | 3  | 6  |
| 852.60                              | 42% | $\gamma\text{CCCH}$             | 9 | 4  | 5  | 7  | 25% | $\gamma\text{CCCH}$             | 3 | 4  | 5  | 7  |
|                                     | 13% | $\gamma\text{COCH}$             | 2 | 1  | 5  | 7  |     |                                 |   |    |    |    |
| 638.39                              | 14% | $\gamma\text{COC=C}$            | 5 | 1  | 2  | 3  | 12% | $\gamma\text{OC=CC}$            | 1 | 2  | 3  | 4  |
|                                     | 7%  | $\gamma\text{COC=C}$            | 2 | 1  | 5  | 4  | 6%  | $\gamma\text{OC=CC}$            | 1 | 2  | 3  | 4  |
|                                     | 6%  | $\gamma\text{OCCH}$             | 1 | 2  | 3  | 6  |     |                                 |   |    |    |    |
| 628.76                              | 9%  | $\gamma\text{CCCH}$             | 3 | 4  | 5  | 7  | 5%  | $\gamma\text{CCCO}$             | 3 | 4  | 5  | 1  |
|                                     | 5%  | $\gamma\text{CCCH}$             | 5 | 4  | 3  | 6  |     |                                 |   |    |    |    |
| 138.84                              | 24% | $\gamma\text{CCCC}$             | 8 | 2  | 3  | 4  | 12% | $\gamma\text{COCC}$             | 5 | 1  | 2  | 8  |
|                                     | 9%  | $\gamma\text{CC=CH}$            | 8 | 2  | 3  | 6  | 8%  | $\gamma\text{CC=CO}$            | 9 | 4  | 5  | 1  |
|                                     | 8%  | $\gamma\text{C=CCC}$            | 2 | 3  | 4  | 9  |     |                                 |   |    |    |    |



**Table S9.** Different types of vibration modes and the corresponding numerical values of frequencies for 25DCFH<sup>+</sup>.

| Fréquence<br>(cm <sup>-1</sup> ) | PED<br>(%) | Mode  | Atoms |    |   |   | PED<br>(%) | Mode   | Atoms |   |   |   |
|----------------------------------|------------|-------|-------|----|---|---|------------|--------|-------|---|---|---|
|                                  |            |       | h     | k  | l | m |            |        | h     | k | l | m |
| <b>In plane vibration modes</b>  |            |       |       |    |   |   |            |        |       |   |   |   |
| 3436.19                          | 97%        | vNH   | 10    | 12 | 0 | 0 |            |        |       |   |   |   |
| 3150.29                          | 50%        | vCH   | 4     | 7  | 0 | 0 | 49%        | vCH    | 3     | 6 | 0 | 0 |
| 3141.32                          | 50%        | vCH   | 3     | 6  | 0 | 0 | 49%        | vCH    | 4     | 7 | 0 | 0 |
| 2306.09                          | 84%        | vC≡N  | 9     | 11 | 0 | 0 | 15%        | vCC    | 5     | 9 | 0 | 0 |
| 2228.75                          | 83%        | vC≡N  | 8     | 10 | 0 | 0 | 14%        | vCC    | 2     | 8 | 0 | 0 |
| 1582.07                          | 40%        | vC=C  | 4     | 5  | 0 | 0 | 27%        | vC=C   | 2     | 3 | 0 | 0 |
|                                  | 7%         | vCC   | 5     | 9  | 0 | 0 | 7%         | δCCH   | 3     | 4 | 7 | 0 |
|                                  | 5%         | δCCH  | 4     | 3  | 6 | 0 |            |        |       |   |   |   |
| 1511.71                          | 36%        | vC=C  | 2     | 3  | 0 | 0 | 19%        | vC=C   | 4     | 5 | 0 | 0 |
|                                  | 15%        | δCOC  | 5     | 1  | 2 | 0 | 11%        | vCC    | 5     | 9 | 0 | 0 |
|                                  | 8%         | vCC   | 2     | 8  | 0 | 0 |            |        |       |   |   |   |
| 1347.73                          | 19%        | vOC   | 1     | 2  | 0 | 0 | 15%        | vOC    | 1     | 5 | 0 | 0 |
|                                  | 13%        | vCC   | 3     | 4  | 0 | 0 | 11%        | δCCH   | 2     | 3 | 6 | 0 |
|                                  | 8%         | δCCH  | 5     | 4  | 7 | 0 | 6%         | δOCC   | 1     | 2 | 8 | 0 |
| 1274.80                          | 36%        | vOC   | 1     | 2  | 0 | 0 | 20%        | vCC    | 3     | 4 | 0 | 0 |
|                                  | 16%        | vCC   | 2     | 8  | 0 | 0 | 7%         | vOC    | 1     | 5 | 0 | 0 |
|                                  | 7%         | δCCH  | 5     | 4  | 7 | 0 |            |        |       |   |   |   |
| 1211.42                          | 31%        | vOC   | 1     | 2  | 0 | 0 | 22%        | vCC    | 3     | 4 | 0 | 0 |
|                                  | 11%        | δCCH  | 2     | 3  | 6 | 0 | 8%         | vCC    | 5     | 9 | 0 | 0 |
|                                  | 8%         | vC=C  | 4     | 5  | 0 | 0 | 6%         | vCCH   | 4     | 3 | 6 | 0 |
| 1158.70                          | 28%        | δCCH  | 3     | 4  | 7 | 0 | 21%        | δC=CH  | 5     | 4 | 7 | 0 |
|                                  | 20%        | δCCH  | 4     | 3  | 6 | 0 | 13%        | δC=CH  | 2     | 3 | 6 | 0 |
|                                  | 6%         | vCC   | 2     | 8  | 0 | 0 | 6%         | vCC    | 5     | 9 | 0 | 0 |
| 998.31                           | 14%        | δC=CH | 5     | 4  | 7 | 0 | 13%        | δCCH   | 3     | 4 | 7 | 0 |
|                                  | 12%        | δCCH  | 4     | 3  | 6 | 0 | 11%        | δCCH   | 5     | 1 | 2 | 0 |
|                                  | 10%        | vCC   | 1     | 5  | 0 | 0 | 8%         | vCC    | 3     | 4 | 0 | 0 |
| 971.02                           | 26%        | δCOC  | 5     | 1  | 2 | 0 | 14%        | δCCH   | 3     | 4 | 7 | 0 |
|                                  | 13%        | δC=CC | 4     | 3  | 6 | 0 | 13%        | δCCH   | 5     | 4 | 7 | 0 |
|                                  | 9%         | vCC   | 3     | 4  | 0 | 0 | 9%         | vCC    | 2     | 8 | 0 | 0 |
| 965.21                           | 24%        | δCCH  | 2     | 3  | 6 | 0 | 13%        | δOCC   | 1     | 2 | 3 | 0 |
|                                  | 13%        | vCC   | 3     | 4  | 0 | 0 | 12%        | δOC    | 1     | 5 | 0 | 0 |
|                                  | 8%         | vCC   | 5     | 9  | 0 | 0 | 7%         | δCCH   | 4     | 3 | 6 | 0 |
| 920.24                           | 33%        | δHCCH | 6     | 3  | 4 | 7 | 13%        | δCCCH  | 5     | 4 | 3 | 6 |
|                                  | 11%        | δCCCH | 8     | 2  | 3 | 6 | 10%        | δOC=CH | 1     | 5 | 4 | 7 |
|                                  | 8%         | δOCC  | 9     | 5  | 4 | 7 |            |        |       |   |   |   |
| 824.13                           | 29%        | δCCCH | 9     | 5  | 4 | 7 | 16%        | δC=CCH | 2     | 3 | 4 | 7 |

|                                     |     |                                 |   |    |    |    |                            |                                 |   |    |    |    |
|-------------------------------------|-----|---------------------------------|---|----|----|----|----------------------------|---------------------------------|---|----|----|----|
|                                     | 12% | $\delta\text{OC}=\text{CH}$     | 1 | 5  | 4  | 7  |                            |                                 |   |    |    |    |
| 777.31                              | 19% | $\delta\text{C}=\text{CCH}$     | 5 | 4  | 3  | 6  | 16%                        | $\delta\text{OC}=\text{CH}$     | 1 | 2  | 3  | 6  |
|                                     | 12% | $\delta\text{OC}=\text{CH}$     | 1 | 5  | 4  | 7  | 6%                         | $\delta\text{CC}\equiv\text{N}$ | 2 | 8  | 10 | 1  |
|                                     | 5%  | $\delta\text{CC}\equiv\text{N}$ | 2 | 8  | 10 | 2  |                            |                                 |   |    |    |    |
| 635.90                              | 34% | $\delta\text{CC}\equiv\text{N}$ | 2 | 8  | 10 | 2  | 18%                        | $\delta\text{OCC}$              | 1 | 2  | 8  | 0  |
|                                     | 13% | $\delta\text{OC}=\text{C}$      | 1 | 2  | 3  | 0  | 7%                         | $\delta\text{C}=\text{CC}$      | 4 | 5  | 9  | 0  |
|                                     | 6%  | $\nu\text{CC}$                  | 2 | 8  | 0  | 0  | 5%                         | $\delta\text{CNH}$              | 8 | 10 | 6  | 12 |
| 610.50                              | 32% | $\delta\text{CC}\equiv\text{N}$ | 2 | 8  | 10 | 2  | 21%                        | $\delta\text{CNH}$              | 8 | 10 | 6  | 12 |
|                                     | 8%  | $\delta\text{OCC}$              | 1 | 2  | 8  | 0  | 6%                         | $\nu\text{CC}$                  | 5 | 9  | 0  | 0  |
|                                     | 6%  | $\delta\text{CC}\equiv\text{N}$ | 2 | 8  | 10 | 1  | $\delta\text{OC}=\text{C}$ | 1                               | 2 | 3  | 0  |    |
| 605.55                              | 37% | $\delta\text{CC}\equiv\text{N}$ | 5 | 9  | 11 | 3  | 27%                        | $\delta\text{CC}\equiv\text{N}$ | 5 | 9  | 11 | 4  |
|                                     | 6%  | $\delta\text{CC}\equiv\text{N}$ | 2 | 8  | 10 | 1  |                            |                                 |   |    |    |    |
| 587.09                              | 76% | $\delta\text{CNH}$              | 8 | 10 | 6  | 12 | 6%                         | $\nu\text{OCC}$                 | 1 | 2  | 8  | 0  |
| 528.13                              | 23% | $\delta\text{CC}\equiv\text{N}$ | 2 | 8  | 10 | 2  | 19%                        | $\delta\text{CC}\equiv\text{N}$ | 5 | 9  | 11 | 4  |
|                                     | 15% | $\delta\text{COC}$              | 5 | 1  | 2  | 0  | 13%                        | $\delta\text{C}=\text{CC}$      | 4 | 5  | 9  | 0  |
|                                     | 11% | $\delta\text{CC}\equiv\text{N}$ | 2 | 8  | 10 | 1  | 6%                         | $\nu\text{CC}$                  | 5 | 9  | 0  | 0  |
| 511.40                              | 64% | $\delta\text{CC}\equiv\text{N}$ | 2 | 8  | 10 | 1  | 27%                        | $\delta\text{CC}\equiv\text{N}$ | 2 | 8  | 10 | 2  |
| 495.92                              | 30% | $\delta\text{CC}\equiv\text{N}$ | 2 | 8  | 10 | 2  | 24%                        | $\delta\text{CC}\equiv\text{N}$ | 2 | 8  | 10 | 1  |
|                                     | 9%  | $\delta\text{CC}\equiv\text{N}$ | 5 | 9  | 11 | 4  | 8%                         | $\delta\text{COC}$              | 5 | 1  | 2  | 0  |
|                                     | 8%  | $\nu\text{CC}$                  | 2 | 8  | 0  | 0  | 6%                         | $\nu\text{CC}$                  | 5 | 9  | 0  | 0  |
| 440.99                              | 55% | $\delta\text{CC}\equiv\text{N}$ | 5 | 9  | 11 | 3  | 34%                        | $\delta\text{CC}\equiv\text{N}$ | 5 | 9  | 11 | 4  |
| 248.17                              | 34% | $\delta\text{CC}\equiv\text{N}$ | 2 | 8  | 10 | 1  | 33%                        | $\delta\text{CNH}$              | 8 | 10 | 5  | 12 |
|                                     | 18% | $\delta\text{CC}\equiv\text{N}$ | 2 | 8  | 10 | 2  | 7%                         | $\nu\text{C}\equiv\text{N}$     | 8 | 10 | 0  | 0  |
| 231.72                              | 35% | $\delta\text{CC}\equiv\text{N}$ | 2 | 8  | 10 | 2  | 24%                        | $\delta\text{OCC}$              | 1 | 2  | 8  | 0  |
|                                     | 19% | $\delta\text{CC}\equiv\text{N}$ | 5 | 9  | 11 | 4  | 18%                        | $\delta\text{C}=\text{CC}$      | 4 | 5  | 9  | 0  |
| 224.91                              | 24% | $\delta\text{CNH}$              | 8 | 10 | 5  | 12 | 19%                        | $\delta\text{CC}\equiv\text{N}$ | 5 | 9  | 11 | 3  |
|                                     | 14% | $\delta\text{CC}\equiv\text{N}$ | 5 | 9  | 11 | 4  | 10%                        | $\delta\text{CC}=\text{CC}$     | 4 | 3  | 2  | 8  |
|                                     | 7%  | $\delta\text{CC}=\text{CC}$     | 3 | 4  | 5  | 9  | 6%                         | $\delta\text{CC}=\text{CH}$     | 9 | 5  | 4  | 7  |
| 148.89                              | 31% | $\delta\text{C}=\text{CC}$      | 4 | 5  | 9  | 0  | 28%                        | $\delta\text{CC}\equiv\text{N}$ | 2 | 8  | 10 | 2  |
|                                     | 27% | $\delta\text{OCC}$              | 1 | 2  | 8  | 0  | 7%                         | $\delta\text{CC}\equiv\text{N}$ | 5 | 9  | 11 | 4  |
| 132.74                              | 27% | $\delta\text{CCCC}$             | 4 | 3  | 2  | 8  | 13%                        | $\delta\text{CNH}$              | 8 | 10 | 5  | 12 |
|                                     | 12% | $\delta\text{CC}=\text{CC}$     | 3 | 4  | 5  | 9  | 12%                        | $\delta\text{COCC}$             | 5 | 1  | 2  | 9  |
|                                     | 11% | $\delta\text{CC}=\text{CH}$     | 8 | 2  | 3  | 6  | 7%                         | $\delta\text{CC}=\text{CH}$     | 9 | 5  | 4  | 7  |
| <b>Out of plane vibration modes</b> |     |                                 |   |    |    |    |                            |                                 |   |    |    |    |
| 920.24                              | 7%  | $\gamma\text{C}=\text{COC}$     | 4 | 5  | 1  | 2  |                            |                                 |   |    |    |    |
| 824.13                              | 13% | $\gamma\text{C}=\text{COC}$     | 4 | 5  | 1  | 2  |                            |                                 |   |    |    |    |
| 777.31                              | 20% | $\gamma\text{C}=\text{COC}$     | 4 | 5  | 1  | 2  |                            |                                 |   |    |    |    |
| 605.55                              | 5%  | $\gamma\text{C}=\text{COC}$     | 4 | 5  | 1  | 2  |                            |                                 |   |    |    |    |

**Table S10.** Different types of vibration modes and the corresponding numerical values of frequencies for 34DCFH<sup>+</sup>.

| Fréquence<br>(cm <sup>-1</sup> ) | PED<br>(%) | Mode  | Atoms |    |    |   | PED<br>(%) | Mode  | Atoms |   |    |   |
|----------------------------------|------------|-------|-------|----|----|---|------------|-------|-------|---|----|---|
|                                  |            |       | h     | k  | l  | m |            |       | h     | k | l  | m |
| <b>in-plane vibrational mode</b> |            |       |       |    |    |   |            |       |       |   |    |   |
| 3458.46                          | 96%        | vNH   | 11    | 12 | 0  | 0 |            |       |       |   |    |   |
| 3201.13                          | 51%        | vCH   | 2     | 6  | 0  | 0 | 48%        | vCH   | 5     | 7 | 0  | 0 |
| 3196.63                          | 51%        | vCH   | 5     | 7  | 0  | 0 | 48%        | vCH   | 2     | 6 | 0  | 0 |
| 2308.05                          | 91%        | vC≡N  | 8     | 10 | 0  | 0 | 7%         | vCC   | 3     | 8 | 0  | 0 |
| 2229.42                          | 88%        | vC≡N  | 9     | 11 | 0  | 0 | 7%         | vCC   | 4     | 9 | 0  | 0 |
| 1578.02                          | 36%        | vC=C  | 4     | 5  | 0  | 0 | 16%        | vC=C  | 2     | 3 | 0  | 0 |
|                                  | 9%         | δCCC  | 4     | 3  | 8  | 0 | 6%         | δCCC  | 3     | 4 | 5  | 0 |
|                                  | 6%         | δCCC  | 3     | 4  | 9  | 0 |            |       |       |   |    |   |
| 1545.96                          | 43%        | vC=C  | 2     | 3  | 0  | 0 | 14%        | vC=C  | 4     | 5 | 0  | 0 |
|                                  | 8%         | δOCH  | 1     | 2  | 6  | 0 | 5%         | δCCH  | 3     | 2 | 6  | 0 |
| 1319.71                          | 45%        | vCC   | 3     | 4  | 0  | 0 | 8%         | vCC   | 4     | 9 | 0  | 0 |
|                                  | 7%         | vCC   | 3     | 8  | 0  | 0 | 6%         | vC=C  | 4     | 5 | 0  | 0 |
|                                  | 5%         | δC=CC | 5     | 4  | 9  | 0 |            |       |       |   |    |   |
| 1286.12                          | 16%        | δOCH  | 1     | 5  | 7  | 0 | 14%        | vCC   | 1     | 2 | 0  | 0 |
|                                  | 13%        | δOCH  | 1     | 2  | 6  | 0 | 12%        | vCC   | 3     | 4 | 0  | 0 |
|                                  | 12%        | vOC   | 1     | 5  | 0  | 0 | 9%         | δCCH  | 4     | 5 | 7  | 0 |
| 1211.03                          | 36%        | vOC   | 1     | 5  | 0  | 0 | 33%        | vOC   | 1     | 2 | 0  | 0 |
|                                  | 8%         | δOCH  | 1     | 5  | 7  | 0 |            |       |       |   |    |   |
| 1186.73                          | 20%        | δOCH  | 1     | 2  | 6  | 0 | 19%        | δOCH  | 1     | 5 | 7  | 0 |
|                                  | 18%        | δC=CH | 4     | 5  | 7  | 0 | 17%        | δC=CH | 3     | 2 | 6  | 0 |
|                                  | 9%         | vOC   | 1     | 5  | 0  | 0 | 8%         | vOC   | 1     | 2 | 0  | 0 |
| 1137.68                          | 13%        | vCC   | 3     | 8  | 0  | 0 | 12%        | δC=CC | 2     | 3 | 8  | 0 |
|                                  | 11%        | δC=CC | 5     | 4  | 9  | 0 | 8%         | vCC   | 4     | 9 | 0  | 0 |
|                                  | 7%         | δCC=C | 3     | 4  | 5  | 0 | 7%         | δOC=C | 1     | 5 | 4  | 0 |
| 1082.57                          | 30%        | vOC   | 1     | 2  | 0  | 0 | 15%        | vOC   | 1     | 5 | 0  | 0 |
|                                  | 11%        | δOCH  | 1     | 2  | 6  | 0 | 11%        | δOCH  | 1     | 5 | 7  | 0 |
|                                  | 8%         | δC=CC | 2     | 3  | 8  | 0 | 6%         | δC=CH | 4     | 5 | 7  | 0 |
| 866.70                           | 28%        | δCOC  | 5     | 1  | 2  | 0 | 18%        | vCC   | 3     | 4 | 0  | 0 |
|                                  | 9%         | vCC   | 3     | 8  | 0  | 0 | 8%         | δOCC  | 1     | 2 | 3  | 0 |
|                                  | 8%         | vOC=C | 1     | 5  | 4  | 0 | 8%         | δC=CH | 3     | 2 | 6  | 0 |
| 662.58                           | 37%        | δCC≡N | 4     | 9  | 11 | 3 | 27%        | δCC≡N | 4     | 9 | 11 | 4 |
|                                  | 15%        | vCC   | 3     | 8  | 0  | 0 | 8%         | vCC   | 4     | 9 | 0  | 0 |
|                                  | 6%         | δCCC  | 3     | 4  | 9  | 0 |            |       |       |   |    |   |
| 641.12                           | 17%        | δCC≡N | 4     | 9  | 11 | 4 | 7%         | δCC≡N | 4     | 9 | 11 | 3 |
| 627.96                           | 58%        | vCC   | 3     | 8  | 0  | 0 | 10%        | δCCC  | 3     | 4 | 8  | 0 |
|                                  | 9%         | vCC   | 3     | 4  | 0  | 0 |            |       |       |   |    |   |

|        |      |                                 |   |    |    |    |     |                                 |   |    |    |    |
|--------|------|---------------------------------|---|----|----|----|-----|---------------------------------|---|----|----|----|
| 592.27 | 44%  | $\delta\text{CC}\equiv\text{N}$ | 4 | 9  | 11 | 4  | 19% | $\delta\text{CC}\equiv\text{N}$ | 4 | 9  | 11 | 3  |
|        | 9%   | $\delta\text{CC}\equiv\text{N}$ | 3 | 8  | 2  | 10 | 9%  | $\delta\text{CC}\equiv\text{N}$ | 3 | 8  | 1  | 10 |
| 571.82 | 40%  | $\delta\text{CC}\equiv\text{N}$ | 4 | 9  | 11 | 4  | 27% | $\delta\text{CC}\equiv\text{N}$ | 4 | 9  | 11 | 3  |
|        | 23%  | $\delta\text{CNH}$              | 9 | 11 | 12 | 2  |     |                                 |   |    |    |    |
| 557.79 | 56%  | $\delta\text{CNH}$              | 9 | 11 | 12 | 2  | 13% | $\delta\text{CC}\equiv\text{N}$ | 4 | 9  | 11 | 3  |
|        | 10%  | $\delta\text{CC}\equiv\text{N}$ | 3 | 8  | 2  | 10 | 8%  | $\delta\text{CNH}$              | 9 | 11 | 12 | 1  |
|        | 8%   | $\delta\text{CC}\equiv\text{N}$ | 3 | 8  | 1  | 10 |     |                                 |   |    |    |    |
| 523.38 | 36%  | $\delta\text{CC}\equiv\text{N}$ | 4 | 9  | 11 | 3  | 30% | $\delta\text{CC}\equiv\text{N}$ | 4 | 9  | 11 | 4  |
|        | 19%  | $\nu\text{CC}$                  | 3 | 8  | 0  | 0  |     |                                 |   |    |    |    |
| 487.49 | 29%  | $\delta\text{C}=\text{CC}$      | 2 | 3  | 8  | 0  | 27% | $\nu\text{CC}$                  | 4 | 9  | 0  | 0  |
|        | 8%   | $\delta\text{C}=\text{CC}$      | 2 | 3  | 8  | 0  | 7%  | $\delta\text{C}=\text{CC}$      | 5 | 4  | 9  | 0  |
|        | 6%   | $\delta\text{CC}\equiv\text{N}$ | 3 | 8  | 2  | 10 | 5%  | $\delta\text{CC}=\text{C}$      | 3 | 4  | 5  | 0  |
| 464.87 | 37%  | $\delta\text{CC}\equiv\text{N}$ | 3 | 8  | 1  | 10 | 36% | $\delta\text{CC}\equiv\text{N}$ | 3 | 8  | 2  | 10 |
|        | 18%  | $\delta\text{CC}\equiv\text{N}$ | 4 | 9  | 11 | 4  |     |                                 |   |    |    |    |
| 291.36 | 55%  | $\delta\text{CNH}$              | 9 | 11 | 12 | 1  | 21% | $\delta\text{CC}\equiv\text{N}$ | 4 | 9  | 11 | 4  |
|        | 14%  | $\delta\text{CNH}$              | 9 | 11 | 12 | 2  |     |                                 |   |    |    |    |
| 249.20 | 44%  | $\delta\text{CC}\equiv\text{N}$ | 4 | 9  | 11 | 3  | 37% | $\delta\text{CC}\equiv\text{N}$ | 4 | 9  | 11 | 4  |
| 205.10 | 32%  | $\delta\text{CC}\equiv\text{N}$ | 3 | 8  | 1  | 10 | 19% | $\delta\text{CNH}$              | 9 | 11 | 12 | 1  |
|        | 9%   | $\delta\text{CC}\equiv\text{N}$ | 3 | 8  | 2  | 10 |     |                                 |   |    |    |    |
| 173.34 | 38%  | $\delta\text{CC}\equiv\text{N}$ | 3 | 8  | 2  | 10 | 31% | $\delta\text{CC}\equiv\text{N}$ | 3 | 8  | 1  | 10 |
|        | 15%  | $\delta\text{CC}\equiv\text{N}$ | 4 | 9  | 11 | 4  |     |                                 |   |    |    |    |
| 132.66 | 36%  | $\delta\text{CC}\equiv\text{N}$ | 4 | 9  | 11 | 3  | 21% | $\delta\text{CC}\equiv\text{N}$ | 4 | 9  | 11 | 4  |
|        | 14%  | $\nu\text{CC}$                  | 3 | 8  | 0  | 0  | 11% | $\nu\text{CC}$                  | 4 | 9  | 0  | 0  |
| Modes  | hors | plan                            |   |    |    |    |     |                                 |   |    |    |    |
| 823.03 | 28%  | $\gamma\text{CC}=\text{CH}$     | 9 | 4  | 5  | 7  | 26% | $\gamma\text{CC}=\text{CH}$     | 3 | 4  | 5  | 7  |
|        | 20%  | $\gamma\text{COCH}$             | 2 | 1  | 5  | 7  |     |                                 |   |    |    |    |
| 798.05 | 26%  | $\gamma\text{CC}=\text{CH}$     | 8 | 3  | 2  | 6  | 25% | $\gamma\text{CC}=\text{CH}$     | 4 | 3  | 2  | 6  |
|        | 21%  | $\gamma\text{COCH}$             | 5 | 1  | 2  | 6  |     |                                 |   |    |    |    |
| 641.12 | 18%  | $\gamma\text{CCCC}$             | 9 | 4  | 3  | 8  | 16% | $\gamma\text{C}=\text{CCC}$     | 2 | 3  | 4  | 9  |
|        | 13%  | $\gamma\text{CCC}=\text{C}$     | 8 | 3  | 4  | 5  |     |                                 |   |    |    |    |
| 205.10 | 13%  | $\gamma\text{C}=\text{CCC}$     | 2 | 3  | 4  | 9  | 7%  | $\gamma\text{CCC}=\text{C}$     | 8 | 3  | 4  | 5  |
| 173.34 | 5%   | $\gamma\text{CCCC}$             | 9 | 4  | 3  | 8  |     |                                 |   |    |    |    |

**Table S11.** Different types of vibration modes and the corresponding numerical values of frequencies for 23DCFH<sup>+</sup>.

| T = 10,0 K                            |                         |                         |             |            |            |                                       |                         |                         |             |            |            |
|---------------------------------------|-------------------------|-------------------------|-------------|------------|------------|---------------------------------------|-------------------------|-------------------------|-------------|------------|------------|
| $J'_{K-1K+1} \leftarrow J''_{K-1K+1}$ | $F'_1 \leftarrow F''_1$ | $F'_2 \leftarrow F''_2$ | $\nu_{cal}$ | <i>Err</i> | <i>Int</i> | $J'_{K-1K+1} \leftarrow J''_{K-1K+1}$ | $F'_1 \leftarrow F''_1$ | $F'_2 \leftarrow F''_2$ | $\nu_{cal}$ | <i>Err</i> | <i>Int</i> |
| $13_{94} \leftarrow 12_{93}$          | 14 ← 13                 | 14 ← 14                 | 44088.0058  | 0.0019     | 0.1878     | $22_{022} \leftarrow 21_{121}$        | 21 ← 21                 | 22 ← 22                 | 43009.2082  | 0.3998     | 0.0004     |
|                                       | 12 ← 11                 | 12 ← 12                 | 44088.0238  | 0.0019     | 0.2202     |                                       | 21 ← 21                 | 20 ← 20                 | 43009.2082  | 0.3998     | 0.0597     |
|                                       | 13 ← 12                 | 12 ← 11                 | 44088.0752  | 0.0019     | 30.6600    |                                       | 21 ← 21                 | 21 ← 21                 | 43009.2103  | 0.3998     | 0.0035     |
|                                       | 13 ← 12                 | 14 ← 13                 | 44088.0777  | 0.0019     | 35.8040    |                                       | 21 ← 22                 | 22 ← 23                 | 43009.8637  | 0.0000     | 0.0000     |
|                                       | 12 ← 11                 | 11 ← 10                 | 44088.2027  | 0.0019     | 28.1670    |                                       | 21 ← 20                 | 20 ← 19                 | 43009.8950  | 0.3998     | 0.4670     |
| $23_{221} \leftarrow 23_{122}$        | 22 ← 24                 | 23 ← 23                 | 41101.0056  | 0.0000     | 0.0000     | $21_{121} \leftarrow 20_{120}$        | 20 ← 20                 | 21 ← 21                 | 41099.1943  | 0.3466     | 0.0967     |
|                                       | 24 ← 24                 | 25 ← 25                 | 41101.0141  | 0.3994     | 0.0001     |                                       | 20 ← 20                 | 19 ← 19                 | 41099.1943  | 0.3466     | 0.0664     |
|                                       | 22 ← 22                 | 21 ← 21                 | 41101.0188  | 0.3994     | 0.0224     |                                       | 20 ← 20                 | 20 ← 20                 | 41099.1967  | 0.3466     | 0.1168     |
|                                       | 23 ← 24                 | 24 ← 24                 | 41101.2130  | 0.0000     | 0.0000     |                                       | 20 ← 21                 | 21 ← 22                 | 41099.8477  | 0.0000     | 0.0001     |
|                                       | 23 ← 22                 | 22 ← 22                 | 41101.2264  | 0.0000     | 0.0000     |                                       | 20 ← 19                 | 19 ← 18                 | 41099.8804  | 0.3466     | 0.4949     |
| $18_{316} \leftarrow 17_{315}$        | 17 ← 18                 | 18 ← 18                 | 39193.2204  | 0.0000     | 0.0000     | $19_{118} \leftarrow 18_{217}$        | 18 ← 19                 | 19 ← 19                 | 39191.1474  | 0.0000     | 0.0000     |
|                                       | 17 ← 16                 | 16 ← 16                 | 39193.2343  | 0.1500     | 0.0007     |                                       | 18 ← 17                 | 17 ← 17                 | 39191.1615  | 0.2157     | 0.1396     |
|                                       | 18 ← 17                 | 17 ← 17                 | 39193.2445  | 0.1500     | 0.0001     |                                       | 19 ← 18                 | 18 ← 18                 | 39191.1677  | 0.2157     | 0.0018     |
|                                       | 19 ← 18                 | 20 ← 19                 | 39193.4946  | 0.1500     | 40.6350    |                                       | 18 ← 19                 | 19 ← 20                 | 39191.4638  | 0.0000     | 0.0000     |
|                                       | 17 ← 16                 | 16 ← 15                 | 39193.4959  | 0.1500     | 31.4570    |                                       | 18 ← 17                 | 17 ← 16                 | 39191.4953  | 0.2157     | 34.1230    |
| $22_{220} \leftarrow 22_{121}$        | 22 ← 23                 | 22 ← 23                 | 39189.0722  | 0.0000     | 0.0015     | $18_{117} \leftarrow 17_{116}$        | 19 ← 17                 | 18 ← 17                 | 37280.0122  | 0.0000     | 0.0000     |
|                                       | 22 ← 21                 | 22 ← 21                 | 39189.0991  | 0.0000     | 0.0003     |                                       | 17 ← 17                 | 16 ← 16                 | 37280.3073  | 0.1808     | 0.0008     |
|                                       | 22 ← 23                 | 23 ← 24                 | 39189.1240  | 0.0000     | 0.0001     |                                       | 17 ← 17                 | 18 ← 18                 | 37280.3075  | 0.1808     | 0.0000     |
|                                       | 22 ← 23                 | 21 ← 22                 | 39189.1261  | 0.0000     | 0.0033     |                                       | 17 ← 18                 | 18 ← 19                 | 37280.8708  | 0.0000     | 0.0001     |
|                                       | 22 ← 21                 | 21 ← 20                 | 39189.1532  | 0.0000     | 0.0032     |                                       | 17 ← 16                 | 16 ← 15                 | 37280.9037  | 0.1808     | 34.7520    |

**Table S12.** Different types of vibration modes and the corresponding numerical values of frequencies for 24DCFH<sup>+</sup>.

| T = 10,0 K                            |                         |                         |             |            |            |                                       |                         |                         |             |            |            |
|---------------------------------------|-------------------------|-------------------------|-------------|------------|------------|---------------------------------------|-------------------------|-------------------------|-------------|------------|------------|
| $J'_{K-1K+1} \leftarrow J''_{K-1K+1}$ | $F'_1 \leftarrow F''_1$ | $F'_2 \leftarrow F''_2$ | $\nu_{cal}$ | <i>Err</i> | <i>Int</i> | $J'_{K-1K+1} \leftarrow J''_{K-1K+1}$ | $F'_1 \leftarrow F''_1$ | $F'_2 \leftarrow F''_2$ | $\nu_{cal}$ | <i>Err</i> | <i>Int</i> |
| $25_{124} \leftarrow 24_{123}$        | 24 ← 23                 | 23 ← 23                 | 40597.2888  | 0.0009     | 0.3216     | $24_{222} \leftarrow 23_{221}$        | 24 ← 23                 | 23 ← 22                 | 40222.1067  | 0.0010     | 192.7600   |
|                                       | 26 ← 25                 | 25 ← 25                 | 40597.2914  | 0.0009     | 0.2965     |                                       | 23 ← 22                 | 22 ← 21                 | 40222.1067  | 0.0010     | 184.5100   |
|                                       | 25 ← 24                 | 24 ← 24                 | 40597.2938  | 0.0009     | 0.3108     |                                       | 24 ← 23                 | 25 ← 24                 | 40222.1070  | 0.0010     | 209.5300   |
|                                       | 24 ← 23                 | 23 ← 22                 | 40597.3301  | 0.0009     | 177.7300   |                                       | 23 ← 22                 | 24 ← 23                 | 40222.1071  | 0.0010     | 201.3100   |
|                                       | 26 ← 25                 | 25 ← 26                 | 40597.3310  | 0.0000     | 0.0001     |                                       | 25 ← 24                 | 24 ← 23                 | 40222.1093  | 0.0010     | 201.3300   |
| $24_{718} \leftarrow 23_{717}$        | 24 ← 24                 | 25 ← 25                 | 39114.0044  | 0.0008     | 0.0969     | $23_{221} \leftarrow 22_{220}$        | 23 ← 22                 | 23 ← 23                 | 38567.1130  | 0.0009     | 0.4104     |
|                                       | 24 ← 24                 | 24 ← 24                 | 39114.0044  | 0.0008     | 0.0933     |                                       | 22 ← 21                 | 22 ← 22                 | 38567.1135  | 0.0009     | 0.4209     |
|                                       | 24 ← 24                 | 23 ← 23                 | 39114.0044  | 0.0008     | 0.0892     |                                       | 24 ← 23                 | 24 ← 24                 | 38567.1160  | 0.0009     | 0.3853     |
|                                       | 23 ← 22                 | 22 ← 22                 | 39114.6801  | 0.0008     | 0.3775     |                                       | 23 ← 22                 | 22 ← 21                 | 38567.2308  | 0.0009     | 204.6000   |
|                                       | 23 ← 22                 | 22 ← 21                 | 39114.7048  | 0.0008     | 191.0500   |                                       | 22 ← 21                 | 21 ← 20                 | 38567.2314  | 0.0009     | 195.4500   |
| $22_{1013} \leftarrow 21_{1111}$      | 23 ← 22                 | 22 ← 21                 | 38471.5809  | 0.0000     | 0.0000     | $25_{251} \leftarrow 25_{232}$        | 26 ← 26                 | 25 ← 25                 | 37615.4561  | 0.0378     | 0.0015     |
|                                       | 21 ← 20                 | 20 ← 19                 | 38471.5810  | 0.0000     | 0.0000     |                                       | 26 ← 26                 | 27 ← 27                 | 37615.4562  | 0.0378     | 0.0017     |
|                                       | 23 ← 22                 | 24 ← 23                 | 38471.5830  | 0.0000     | 0.0000     |                                       | 26 ← 26                 | 26 ← 26                 | 37615.4595  | 0.0378     | 0.0016     |
|                                       | 22 ← 21                 | 21 ← 20                 | 38471.5872  | 0.0000     | 0.0000     |                                       | 24 ← 24                 | 23 ← 23                 | 37615.5098  | 0.0378     | 0.0014     |
|                                       | 22 ← 21                 | 23 ← 22                 | 38471.5895  | 0.0000     | 0.0000     |                                       | 24 ← 24                 | 24 ← 24                 | 37615.5132  | 0.0378     | 0.0015     |
| $24_{024} \leftarrow 23_{023}$        | 23 ← 24                 | 24 ← 24                 | 37082.0299  | 0.0000     | 0.0000     | $24_{124} \leftarrow 23_{123}$        | 23 ← 22                 | 22 ← 17                 | 37006.1699  | 0.0009     | 0.3834     |
|                                       | 23 ← 22                 | 22 ← 23                 | 37082.2418  | 0.0000     | 0.0002     |                                       | 24 ← 23                 | 23 ← 16                 | 37006.1729  | 0.0009     | 0.3867     |
|                                       | 25 ← 24                 | 24 ← 25                 | 37082.2456  | 0.0000     | 0.0001     |                                       | 25 ← 24                 | 24 ← 18                 | 37006.1730  | 0.0009     | 0.3495     |
|                                       | 23 ← 22                 | 22 ← 21                 | 37082.2549  | 0.0009     | 197.8200   |                                       | 23 ← 22                 | 21 ← 19                 | 37006.4807  | 0.0009     | 196.6600   |
|                                       | 24 ← 23                 | 23 ← 22                 | 37082.2574  | 0.0009     | 206.6500   |                                       | 25 ← 24                 | 25 ← 15                 | 37006.4829  | 0.0009     | 232.5000   |

**Table S13.** Different types of vibration modes and the corresponding numerical values of frequencies for 25DCFH<sup>+</sup>.

| T = 10,0 K                            |                         |                         |             |            |            |                                       |                         |                         |             |            |            |
|---------------------------------------|-------------------------|-------------------------|-------------|------------|------------|---------------------------------------|-------------------------|-------------------------|-------------|------------|------------|
| $J'_{K-1K+1} \leftarrow J''_{K-1K+1}$ | $F'_1 \leftarrow F''_1$ | $F'_2 \leftarrow F''_2$ | $\nu_{cal}$ | <i>Err</i> | <i>Int</i> | $J'_{K-1K+1} \leftarrow J''_{K-1K+1}$ | $F'_1 \leftarrow F''_1$ | $F'_2 \leftarrow F''_2$ | $\nu_{cal}$ | <i>Err</i> | <i>Int</i> |
| $23_{320} \leftarrow 22_{319}$        | 23 ← 22                 | 23 ← 23                 | 42445.0131  | 0.0885     | 0.1864     | $23_{221} \leftarrow 22_{220}$        | 22 ← 23                 | 23 ← 22                 | 41602.1340  | 0.0000     | 0.0009     |
|                                       | 22 ← 21                 | 22 ← 22                 | 42445.0153  | 0.0885     | 0.2081     |                                       | 22 ← 21                 | 22 ← 21                 | 41602.1491  | 0.0748     | 111.4300   |
|                                       | 24 ← 23                 | 24 ← 24                 | 42445.0156  | 0.0885     | 0.2374     |                                       | 24 ← 23                 | 24 ← 23                 | 41602.1507  | 0.0748     | 121.5500   |
|                                       | 22 ← 22                 | 22 ← 21                 | 42445.3928  | 0.0000     | 0.0003     |                                       | 22 ← 21                 | 21 ← 20                 | 41602.1580  | 0.0748     | 106.4200   |
|                                       | 22 ← 21                 | 21 ← 20                 | 42445.8158  | 0.0885     | 101.8400   |                                       | 24 ← 23                 | 25 ← 24                 | 41602.1609  | 0.0748     | 126.7500   |
| $24_{123} \leftarrow 23_{122}$        | 24 ← 24                 | 24 ← 23                 | 41082.0008  | 0.0000     | 0.0001     | $25_{025} \leftarrow 24_{024}$        | 26 ← 24                 | 25 ← 25                 | 40804.0365  | 0.0000     | 0.0000     |
|                                       | 23 ← 23                 | 23 ← 24                 | 41082.0027  | 0.0000     | 0.0003     |                                       | 24 ← 25                 | 23 ← 24                 | 40804.2370  | 0.0000     | 0.0001     |
|                                       | 25 ← 24                 | 25 ← 25                 | 41082.0144  | 0.0825     | 0.1981     |                                       | 24 ← 25                 | 25 ← 26                 | 40804.2398  | 0.0000     | 0.0001     |
|                                       | 23 ← 23                 | 22 ← 22                 | 41082.9817  | 0.0825     | 0.1990     |                                       | 24 ← 23                 | 24 ← 23                 | 40804.2471  | 0.1013     | 106.1400   |
|                                       | 23 ← 22                 | 22 ← 21                 | 41082.9927  | 0.0825     | 100.7000   |                                       | 24 ← 23                 | 23 ← 22                 | 40804.2483  | 0.1013     | 101.7800   |
| $25_{125} \leftarrow 24_{124}$        | 25 ← 25                 | 25 ← 26                 | 40798.0073  | 0.0000     | 0.0003     | $22_{319} \leftarrow 21_{318}$        | 21 ← 22                 | 22 ← 21                 | 40575.2699  | 0.0000     | 0.0000     |
|                                       | 25 ← 23                 | 25 ← 24                 | 40798.0175  | 0.0000     | 0.0004     |                                       | 22 ← 21                 | 21 ← 20                 | 40575.2807  | 0.0783     | 113.2200   |
|                                       | 24 ← 24                 | 23 ← 23                 | 40798.5649  | 0.1013     | 0.1817     |                                       | 22 ← 21                 | 23 ← 22                 | 40575.2824  | 0.0783     | 124.1100   |
|                                       | 24 ← 24                 | 25 ← 25                 | 40798.5671  | 0.1013     | 0.1658     |                                       | 21 ← 20                 | 20 ← 19                 | 40575.2877  | 0.0783     | 107.9600   |
|                                       | 24 ← 23                 | 23 ← 22                 | 40798.8340  | 0.1013     | 101.7600   |                                       | 23 ← 22                 | 24 ← 23                 | 40575.2898  | 0.0783     | 129.6100   |
| $22_{220} \leftarrow 21_{219}$        | 21 ← 22                 | 21 ← 21                 | 39966.0181  | 0.0000     | 0.0001     | $23_{122} \leftarrow 22_{121}$        | 22 ← 23                 | 23 ← 22                 | 39529.3394  | 0.0000     | 0.0001     |
|                                       | 23 ← 22                 | 23 ← 23                 | 39966.0442  | 0.0667     | 0.2822     |                                       | 22 ← 21                 | 22 ← 21                 | 39529.3738  | 0.0724     | 112.9600   |
|                                       | 22 ← 21                 | 22 ← 22                 | 39966.0679  | 0.0667     | 0.2377     |                                       | 22 ← 23                 | 22 ← 23                 | 39529.3743  | 0.0000     | 0.0001     |
|                                       | 21 ← 21                 | 21 ← 20                 | 39966.3362  | 0.0000     | 0.0026     |                                       | 22 ← 21                 | 21 ← 20                 | 39529.3813  | 0.0724     | 107.9100   |
|                                       | 21 ← 20                 | 20 ← 19                 | 39966.8923  | 0.0667     | 113.7700   |                                       | 22 ← 23                 | 23 ← 24                 | 39529.3833  | 0.0000     | 0.0001     |

**Table S14.** Different types of vibration modes and the corresponding numerical values of frequencies for 34DCFH<sup>+</sup>.

| T = 10,0 K                            |                         |                         |             |            |            |                                       |                         |                         |             |            |            |
|---------------------------------------|-------------------------|-------------------------|-------------|------------|------------|---------------------------------------|-------------------------|-------------------------|-------------|------------|------------|
| $J'_{K-1K+1} \leftarrow J''_{K-1K+1}$ | $F'_1 \leftarrow F''_1$ | $F'_2 \leftarrow F''_2$ | $\nu_{cal}$ | <i>Err</i> | <i>Int</i> | $J'_{K-1K+1} \leftarrow J''_{K-1K+1}$ | $F'_1 \leftarrow F''_1$ | $F'_2 \leftarrow F''_2$ | $\nu_{cal}$ | <i>Err</i> | <i>Int</i> |
| $16_{160} \leftarrow 15_{150}$        | 16 ← 16                 | 17 ← 16                 | 62854.0286  | 0.0000     | 0.0000     | $15_{150} \leftarrow 14_{140}$        | 15 ← 15                 | 16 ← 15                 | 58899.0796  | 0.0000     | 0.0000     |
|                                       | 16 ← 14                 | 16 ← 15                 | 62854.0419  | 0.0000     | 0.0000     |                                       | 15 ← 15                 | 14 ← 15                 | 58899.0854  | 0.0000     | 0.0000     |
|                                       | 16 ← 16                 | 17 ← 17                 | 62854.0562  | 0.0000     | 0.0033     |                                       | 14 ← 13                 | 14 ← 14                 | 58899.1042  | 0.1370     | 0.2120     |
|                                       | 16 ← 16                 | 16 ← 16                 | 62854.0574  | 0.0000     | 0.0029     |                                       | 16 ← 15                 | 16 ← 16                 | 58899.1052  | 0.1370     | 0.1831     |
|                                       | 16 ← 16                 | 16 ← 15                 | 62854.0639  | 0.0000     | 0.0003     |                                       | 15 ← 14                 | 16 ← 15                 | 58899.1851  | 0.1370     | 48.3690    |
| $15_{141} \leftarrow 14_{132}$        | 15 ← 13                 | 15 ← 14                 | 58061.3355  | 0.0000     | 0.0004     | $15_{142} \leftarrow 14_{131}$        | 15 ← 14                 | 15 ← 15                 | 58032.0627  | 0.1360     | 0.2119     |
|                                       | 15 ← 15                 | 15 ← 16                 | 58061.3489  | 0.0000     | 0.0007     |                                       | 16 ← 15                 | 16 ← 16                 | 58032.0858  | 0.1360     | 0.1342     |
|                                       | 15 ← 15                 | 15 ← 15                 | 58061.4652  | 0.1360     | 0.1263     |                                       | 14 ← 13                 | 14 ← 14                 | 58032.0871  | 0.1360     | 0.1719     |
|                                       | 15 ← 13                 | 14 ← 13                 | 58061.5725  | 0.0000     | 0.0315     |                                       | 15 ← 13                 | 14 ← 13                 | 58032.0967  | 0.0000     | 0.0545     |
|                                       | 14 ← 13                 | 13 ← 12                 | 58061.6748  | 0.1360     | 32.8460    |                                       | 14 ← 13                 | 13 ← 12                 | 58032.1998  | 0.1360     | 32.8180    |
| $14_{140} \leftarrow 13_{131}$        | 14 ← 14                 | 15 ← 14                 | 54945.0041  | 0.0000     | 0.0024     | $17_{116} \leftarrow 16_{115}$        | 16 ← 16                 | 15 ← 15                 | 54943.0755  | 0.0000     | 0.0001     |
|                                       | 13 ← 13                 | 13 ← 12                 | 54945.1979  | 0.0000     | 0.0001     |                                       | 16 ← 16                 | 17 ← 17                 | 54943.0769  | 0.0000     | 0.0001     |
|                                       | 13 ← 12                 | 13 ← 13                 | 54945.2346  | 0.1114     | 0.2585     |                                       | 16 ← 16                 | 16 ← 16                 | 54943.1109  | 0.0000     | 0.0001     |
|                                       | 15 ← 14                 | 15 ← 15                 | 54945.2356  | 0.1114     | 0.2207     |                                       | 18 ← 17                 | 18 ← 18                 | 54943.3027  | 0.0000     | 0.0001     |
|                                       | 13 ← 12                 | 12 ← 11                 | 54945.3219  | 0.1114     | 41.1980    |                                       | 14 ← 12                 | 14 ← 13                 | 54943.3575  | 0.0000     | 0.0001     |
| $14_{131} \leftarrow 13_{122}$        | 14 ← 12                 | 14 ← 13                 | 54118.4951  | 0.0000     | 0.0006     | $14_{132} \leftarrow 13_{121}$        | 14 ← 12                 | 14 ← 13                 | 54061.4776  | 0.0000     | 0.0011     |
|                                       | 14 ← 14                 | 14 ← 15                 | 54118.5079  | 0.0000     | 0.0010     |                                       | 14 ← 14                 | 14 ← 15                 | 54061.4898  | 0.0000     | 0.0010     |
|                                       | 14 ← 14                 | 14 ← 14                 | 54118.6263  | 0.1104     | 0.1243     |                                       | 14 ← 14                 | 14 ← 14                 | 54061.6098  | 0.1106     | 0.1115     |
|                                       | 14 ← 12                 | 13 ← 12                 | 54118.7373  | 0.1104     | 0.1290     |                                       | 14 ← 12                 | 13 ← 12                 | 54061.7203  | 0.1106     | 0.3879     |
|                                       | 13 ← 12                 | 12 ← 11                 | 54118.8143  | 0.1104     | 33.5020    |                                       | 13 ← 12                 | 12 ← 11                 | 54061.7994  | 0.1106     | 33.4510    |



## Cartesian coordinates for the optimized and corrected geometries of:

### 1. dicyano-2,3-furan (23DCF)

|   |             |             |             |
|---|-------------|-------------|-------------|
| C | -0.62329700 | 0.13934500  | 0.00005000  |
| C | 0.64265900  | -0.41844600 | -0.00004700 |
| C | 0.43715500  | -1.85466000 | 0.00011600  |
| C | -0.91382000 | -2.02705100 | 0.00000200  |
| O | -1.56150600 | -0.83829100 | -0.00010500 |
| H | 1.20158000  | -2.61283400 | 0.00017200  |
| H | -1.53987000 | -2.89755500 | -0.00001800 |
| C | -1.05864100 | 1.48035000  | 0.00002600  |
| N | -1.40550500 | 2.59948600  | 0.00003400  |
| C | 1.87318900  | 0.26974900  | -0.00002600 |
| N | 2.90732900  | 0.82050900  | -0.00002800 |

### 2. dicyano-2,4-furan (24DCF)

|   |             |             |             |
|---|-------------|-------------|-------------|
| C | -1.08201400 | -0.06152100 | -0.00003800 |
| C | 0.02041600  | -0.87140200 | 0.00025000  |
| C | 1.15776200  | 0.02957700  | -0.00002000 |
| C | 0.62713000  | 1.29885500  | -0.00001900 |
| O | -0.71144500 | 1.25720600  | 0.00008400  |
| H | 0.03919700  | -1.94796900 | 0.00029300  |
| H | 1.08094100  | 2.27084400  | -0.00006000 |
| C | -2.46147200 | -0.35291800 | -0.00005000 |
| N | -3.60217200 | -0.62046800 | -0.00009800 |
| C | 2.52517100  | -0.31395300 | -0.00004500 |
| N | 3.65978000  | -0.60625900 | -0.00008100 |

### 3. dicyano-2,5-furan (25DCF)

|   |             |             |             |
|---|-------------|-------------|-------------|
| C | 1.08970100  | 0.18578300  | 0.00005100  |
| C | 0.71771300  | 1.50982200  | -0.00011900 |
| C | -0.71770300 | 1.50983000  | 0.00009300  |
| C | -1.08970500 | 0.18579400  | 0.00001800  |
| O | -0.00000600 | -0.62608900 | -0.00018500 |
| H | 1.37987500  | 2.35940700  | -0.00007700 |
| H | -1.37985900 | 2.35941900  | 0.00017600  |
| C | 2.36073200  | -0.42437800 | 0.00003800  |
| N | 3.43078300  | -0.90163200 | 0.00007100  |
| C | -2.36073400 | -0.42437100 | 0.00002400  |
| N | -3.43078000 | -0.90163600 | 0.00004300  |

### 4. dicyano-3,4-furan (34DCF)

|   |             |             |             |
|---|-------------|-------------|-------------|
| C | -1.44574700 | 1.09341500  | -0.00019800 |
| C | -0.12530300 | 0.73451700  | 0.00007800  |
| C | -0.12526700 | -0.73451200 | -0.00005400 |

|   |             |             |             |
|---|-------------|-------------|-------------|
| C | -1.44569400 | -1.09347400 | 0.00009700  |
| O | -2.23652400 | -0.00004900 | 0.00005600  |
| H | -1.93586500 | -2.04702500 | 0.00018500  |
| C | 0.98982300  | -1.59729400 | -0.00003300 |
| N | 1.91477600  | -2.31648900 | -0.00003400 |
| C | 0.98974900  | 1.59734800  | 0.00003900  |
| N | 1.91469700  | 2.31655100  | 0.00003600  |
| H | -1.93596500 | 2.04694200  | -0.00026700 |

#### 5. Protonated dicyano-2,3-furan (23DCFH)<sup>+</sup>

|   |             |             |             |
|---|-------------|-------------|-------------|
| O | -1.80590500 | 0.03443600  | -0.00026200 |
| C | -0.51166900 | 0.43566000  | -0.00032900 |
| C | 0.29161500  | -0.69062900 | 0.00001400  |
| C | -0.58347200 | -1.84784900 | 0.00036700  |
| C | -1.83848700 | -1.31892200 | 0.00016600  |
| H | -0.29862500 | -2.88613500 | 0.00076800  |
| H | -2.81444600 | -1.76301800 | 0.00011500  |
| C | -0.20295400 | 1.81134700  | -0.00064800 |
| C | 1.70127800  | -0.66474100 | 0.00023700  |
| N | 0.11470800  | 2.93911800  | 0.00069200  |
| N | 2.87283400  | -0.64939200 | -0.00038200 |
| H | 3.88183600  | -0.62199200 | 0.00126700  |

#### 6. Protonated dicyano-2,4-furan (24DCFH)<sup>+</sup>

|   |             |             |             |
|---|-------------|-------------|-------------|
| O | 0.74425000  | 1.25075400  | -0.00012800 |
| C | 1.11675200  | -0.06742500 | -0.00019900 |
| C | 0.01656100  | -0.88032800 | -0.00004000 |
| C | -1.10516600 | 0.04002100  | 0.00020300  |
| C | -0.59334100 | 1.31700800  | 0.00016800  |
| H | -0.00588000 | -1.95682500 | 0.00022300  |
| H | -1.03863600 | 2.29292700  | 0.00013900  |
| C | 2.49630200  | -0.35838500 | -0.00046000 |
| C | -2.47728600 | -0.28417600 | 0.00037900  |
| N | 3.63729000  | -0.62470700 | 0.00038300  |
| N | -3.61361300 | -0.56972800 | -0.00043200 |
| H | -4.59299900 | -0.81288200 | 0.00174200  |

#### 7. Protonated dicyano-2,5-furan (25DCFH)<sup>+</sup>

|   |             |             |             |
|---|-------------|-------------|-------------|
| O | 0.02974600  | -0.62075000 | 0.01247600  |
| C | -1.04257700 | 0.21395600  | 0.01190300  |
| C | -0.66806600 | 1.53724100  | 0.00152100  |
| C | 0.76714100  | 1.51483000  | -0.00745800 |
| C | 1.12291400  | 0.18636500  | -0.00009200 |
| H | -1.31170400 | 2.40093900  | -0.00124300 |

|   |             |             |             |
|---|-------------|-------------|-------------|
| H | 1.43432200  | 2.36040800  | -0.01835500 |
| C | -2.32047100 | -0.38157000 | 0.02430700  |
| C | 2.38492700  | -0.44223200 | -0.00289000 |
| N | -3.38964500 | -0.85527200 | -0.04817300 |
| N | 3.44535600  | -0.94049400 | -0.00520300 |
| H | -4.27247000 | -1.25676100 | 0.23827800  |

#### 8. Protonated dicyano-3,4-furan (34DCFH)<sup>+</sup>

|   |             |             |             |
|---|-------------|-------------|-------------|
| O | -2.21391800 | -0.49441500 | -0.00004900 |
| C | -1.20660800 | -1.39236400 | 0.00013700  |
| C | -0.01648700 | -0.71709100 | 0.00001500  |
| C | -0.33279500 | 0.71748100  | -0.00011800 |
| C | -1.70066800 | 0.75360900  | -0.00005300 |
| H | -1.47170300 | -2.43123500 | 0.00006700  |
| H | -2.40036600 | 1.56598200  | -0.00054800 |
| C | 0.59316100  | 1.78069500  | 0.00009100  |
| C | 1.27308300  | -1.28702700 | 0.00036700  |
| N | 1.40224000  | 2.62814400  | 0.00003000  |
| N | 2.35934100  | -1.72614500 | -0.00039200 |
| H | 3.29806700  | -2.09782800 | 0.00108300  |
